# Supplementary material for: Xanthine oxidase inhibitors for prevention of cardiovascular events: a systematic review and meta-analysis of randomized controlled trials
Source: PubMed Central journal article supplement (PMC5804046; doi:10.1186/s12872-018-0757-9), 2018-02-07
Supplement: 12872_2018_757_MOESM2_ESM.pdf [file 12872_2018_757_MOESM2_ESM.pdf]

**ADDITIONAL FILE 2. Bredemeier et al. Xanthine Oxidase Inhibitors for Prevention of Cardiovascular Events: A Systematic Review and Meta-Analysis of Randomized Controlled Trials. BMC Cardiovascular Disorders.**

Description of the studies included in the meta-analysis.

| Study                 | Study Design | Publication format | Population                      | Intervention vs comparator        | Age (mean) | Male (%) | Prevalence of gout (%) | Prevalence of risk factors or cardiovascular diseases (%) | Use of medications (%)      | Duration of follow-up (days) | Industry Sponsoring                                                          |
|-----------------------|--------------|--------------------|---------------------------------|-----------------------------------|------------|----------|------------------------|-----------------------------------------------------------|-----------------------------|------------------------------|------------------------------------------------------------------------------|
| Akhondzadeh, 2005 (1) | Parallel     | Full text          | Schizophrenia                   | Allopurinol 300mg vs Placebo      | 34.4       | 71.7     | NR                     | NR                                                        | NR                          | 60                           | No                                                                           |
| Akhondzadeh, 2006 (2) | Parallel     | Full text          | Manic episode                   | Allopurinol 300mg vs Placebo      | 26.2       | 51.2     | NR                     | NR                                                        | NR                          | 60                           | No                                                                           |
| Becker, 2005 (3)      | Parallel     | Full text          | Gout                            | Febuxostat 40-80-120mg vs Placebo | 54         | 90.8     | 100                    | SAH 49, DM 13                                             | SA 0                        | 30                           | Yes (TAP Pharmaceutical Products)                                            |
| Borgi, 2017 (4)       | Parallel     | Full text          | Overweight/obese, Hyperuricemic | Allopurinol 300-600mg vs Placebo  | 41         | 48.9     | NR                     | Sm 8.1                                                    | NR                          | 60                           | No (National Institutes of Health/National Heart, Lung, and Blood Institute) |
| Bowden, 2013(5)       | Parallel     | Full text          | CKD                             | Allopurinol 300mg vs Placebo      | 60.8       | 58.3     | NR                     | CKD 100, DM 54.2                                          | NR                          | 56                           | No                                                                           |
| Brunstein, 2005 (6)   | Cross-over   | Full text          | Schizophrenia                   | Allopurinol 600mg vs Placebo      | 38.6       | 60.9     | 0                      | HF 0, IC 0, CKD 0, MI 0, S 0, SAH 0, DM 0                 | ACEi/ARB 0, D 0, St 0, AS 0 | 42                           | No                                                                           |
| Chen, 2009 (7)        | Parallel     | Full text          | HF, Hyperuricemic               | Allopurinol 300mg vs no treatment | 60         | 60       | 0                      | HF 100, CKD 0, IC 42.5                                    | NR                          | 90                           | NR                                                                           |

ACEi – Angiotensin-converting enzyme inhibitors, ARB – Angiotensin II receptor blockers, CKD - Chronic kidney disease, CVD – Cardiovascular disease, D – Diuretics, DM – Diabetes mellitus, HF - Heart failure, IC - Ischemic cardiomyopathy, LVH – Left ventricular hypertrophy, MI - Myocardial infarction, NR – Not reported, S – Stroke, SA – Salicylic acid, SAH – Systemic arterial hypertension, Sm – Smoking, St – Statins

|                      |          |           |                                         |                                       |      |      |    |                                                   |                                         |            |                                         |
|----------------------|----------|-----------|-----------------------------------------|---------------------------------------|------|------|----|---------------------------------------------------|-----------------------------------------|------------|-----------------------------------------|
| Chen, 2014 (8)       | Parallel | Full text | Hemodialysis                            | Allopurinol 200-300mg vs no treatment | NR   | 51.6 | NR | CKD 100                                           | NR                                      | 270        | NR                                      |
| Cingolani, 2006 (9)  | Parallel | Full text | HF                                      | Oxypurinol 600mg vs Placebo           | 68.6 | 61.7 | 0  | HF 100, IC 55                                     | ACEi/ARB 80, St 25, SA 63.3             | 30         | Yes (Cardiome Pharma Corp).             |
| Dawson, 2009 (10)    | Parallel | Full text | Subcortical stroke                      | Allopurinol 300mg vs Placebo          | 58.3 | NR   | 0  | MI 0, S 100, SAH 59.1, DM 10.2, Sm 44.9           | ACEi/ARB 55.1, D 34.7, St 93.9, SA 95.9 | 90         | No (West Endowments Research Fund)      |
| Deng, 2010 (11)      | Parallel | Full text | CKD, hyperuricemia                      | Allopurinol 100-300mg vs No treatment | 59.3 | 52.4 | NR | CKD 100, DM 34.4                                  | NR                                      | 365        | NR                                      |
| Dickerson, 2009 (12) | Parallel | Full text | Schizophrenia                           | Allopurinol 600mg vs Placebo          | 43.1 | 66   | 0  | DM 0, HF 0, IC 0, CKD 0, MI 0, S 0                | NR                                      | 60         | No (Stanley Medical Research Institute) |
| Dogan, 2011 (13)     | Parallel | Full text | DM                                      | Allopurinol 900mg vs Placebo          | 50.3 | 51   | 0  | HF 0, IC 0, CKF 0, MI 0, S 0, SAH 0, DM 100, Sm 0 | ACEi/ARB 0, St 74, SA 85                | 84         | No                                      |
| Eddeland, 1983 (14)  | Parallel | Full text | Indwelling Urethral Catheters           | Allopurinol 300mg vs Placebo          | 76.2 | 23.3 | NR | NR                                                | NR                                      | 210 (mean) | No                                      |
| Ettinger, 1986 (15)  | Parallel | Full text | Recurrent calcium oxalate stone disease | Allopurinol 300mg vs Placebo          | 47.6 | NR   | NR | CKD 0                                             | NR                                      | 168        | Partial (Burroughs Wellcome Company)    |
| Fan, 2012 (16)       | Parallel | Full text | Manic episode                           | Allopurinol 600mg vs Placebo          | 42.8 | 51.8 | 0  | HF 0, IC 0, CKD 0, MI 0, S 0                      | NR                                      | 42         | NR                                      |

ACEi – Angiotensin-converting enzyme inhibitors, ARB – Angiotensin II receptor blockers, CKD - Chronic kidney disease, CVD – Cardiovascular disease, D – Diuretics, DM – Diabetes mellitus, HF - Heart failure, IC - Ischemic cardiomyopathy, LVH – Left ventricular hypertrophy, MI - Myocardial infarction, NR – Not reported, S – Stroke, SA – Salicylic acid, SAH – Systemic arterial hypertension, Sm – Smoking, St – Statins

|                        |            |           |                                      |                                                 |      |      |      |                                                    |                                  |            |                                                   |
|------------------------|------------|-----------|--------------------------------------|-------------------------------------------------|------|------|------|----------------------------------------------------|----------------------------------|------------|---------------------------------------------------|
| Feurman, 1973 (17)     | Cross-over | Full text | Psoriasis                            | Allopurinol 600mg vs Placebo                    | 48.4 | 61.5 | 0    | HF 0, IC 0, CKD 0, MI 0, S 0, SAH 0, DM 15.4       | NR                               | 56         | No                                                |
| George, 2006 (18)      | Cross-over | Full text | HF                                   | Allopurinol 300-600mg vs Placebo                | 69.7 | 83.3 | NR   | HF 100, CKD 0, MI 70, CI 96.6, SAH 60, Sm 10       | ACEi/ARB 89.9, D 0, SA 80, St 90 | 28         | No (British Heart Foundation)                     |
| Gibson, 1982 (19)      | Parallel   | Full text | Gout                                 | Allopurinol 200mg vs Placebo                    | 49   | 98.3 | 100  | CKD 0, SAH 22                                      | NR                               | 730        | No (Arthritis and Rheumatism Council)             |
| Givertz, 2015 (20)     | Parallel   | Full text | HF                                   | Allopurinol 600mg vs Placebo                    | 63   | 82.2 | 22.5 | HF 100, IC 53.3, MI 0, SAH 78.2, DM 54.5           | ACEi/ARB 84.6                    | 180        | No (National Institutes of Health)                |
| *Goicoechea, 2010 (21) | Parallel   | Full text | CKD                                  | Allopurinol 100mg vs No treatment               | 71.7 | NR   | NR   | IC 23.5, CKD 100, DM 37.2                          | ACEi/ARB 77.9, D 58.4, St 45.1   | 702 (mean) | No                                                |
| Goldfarb, 2013 (22)    | Parallel   | Full text | Hyperuricosuric                      | Allopurinol 300mg vs Febuxostat 80mg vs Placebo | 47.4 | 85.9 | 0    | CKD 61.2, MI 30.3, S 0, SAH 27.2, DM 12.2, Sm 21.2 | ACEi 18.2, St 28.3, D 5.1        | 180        | Yes (Takeda Global Research & Development Center) |
| Greig, 2011 (23)       | Parallel   | Full text | HF                                   | Allopurinol 300mg vs Placebo                    | 59.5 | 82.4 | NR   | HF 100, IC 21.6, SAH 59.5, DM 14.9, Sm 13.5        | ACEi/ARB 91.9, D 77, St 100      | 28         | No (FONDECYT, FONDAP)                             |
| Guo, 2015 (24)         | Parallel   | Full text | Hyperuricemic, Acute ischemic stroke | Allopurinol 300mg vs no treatment               | 67.4 | 63.7 | 0    | HF 0, CKD 0, DM 0                                  | NR                               | 84         | NR                                                |

ACEi – Angiotensin-converting enzyme inhibitors, ARB – Angiotensin II receptor blockers, CKD - Chronic kidney disease, CVD – Cardiovascular disease, D – Diuretics, DM – Diabetes mellitus, HF - Heart failure, IC - Ischemic cardiomyopathy, LVH – Left ventricular hypertrophy, MI - Myocardial infarction, NR – Not reported, S – Stroke, SA – Salicylic acid, SAH – Systemic arterial hypertension, Sm – Smoking, St – Statins

|                           |          |           |                                       |                                                        |      |      |      |                                   |                                           |     |                                                                      |
|---------------------------|----------|-----------|---------------------------------------|--------------------------------------------------------|------|------|------|-----------------------------------|-------------------------------------------|-----|----------------------------------------------------------------------|
| Guo, 2016 (25)            | Parallel | Full text | Acute Ischemic Stroke, hyperuricemia  | Allopurinol vs no treatment                            | 32   | 61.2 | NR   | DM 0                              | NR                                        | 90  | NR                                                                   |
| Hare, 2008 (26)           | Parallel | Full text | HF                                    | Oxypurinol 600mg vs Placebo                            | 64.5 | 72.8 | NR   | HF 100, IC 61                     | D 95                                      | 168 | Yes (Cardiome Pharma Corp.)                                          |
| Higgins, 2014 (27)        | Parallel | Full text | Stroke and Transient ischaemic attack | Allopurinol 300mg vs Placebo                           | 67.9 | 57.5 | 0    | SAH 42.5, DM 13.7, Sm 18.7, IC 10 | ACEi/ARB 48.75, D 31.25, SA 92.5, St 92.5 | 360 | No (The stroke Association, UK and Scottish Stroke Research Network) |
| Hill, 2015 (28)           | Parallel | Full text | Gout                                  | Allopurinol 200mg vs Placebo                           | 55.5 | 94.3 | 100  | NR                                | NR                                        | 28  | No                                                                   |
| Hosoya, 2014 (29)         | Parallel | Full text | Hyperuricemia CKD                     | Topiroxostat 160mg vs Placebo                          | 63.5 | 89.3 | NR   | CKD 100, DM 35,2                  | ACEi/ARB 56,5                             | 154 | Yes (Sanwa Kagaku Kenkyusho Co.)                                     |
| Hosoya, 2016 fase 2a (30) | Parallel | Full text | Gout, hyperuricemia                   | Topiroxostat 40-60-80-120mg vs Placebo                 | 45.5 | 100  | 66.6 | DM 0, CKD 0                       | NR                                        | 60  | Yes (Fuji Yakuhin Co.)                                               |
| Hosoya, 2016 fase 2b (31) | Parallel | Full text | Hyperuricemia                         | Allopurinol 200mg vs Topiroxostat 120-160mg vs Placebo | 51.4 | 98   | NR   | CKD 0                             | NR                                        | 120 | Yes (Fuji Yakuhin Co.)                                               |

ACEi – Angiotensin-converting enzyme inhibitors, ARB – Angiotensin II receptor blockers, CKD - Chronic kidney disease, CVD – Cardiovascular disease, D – Diuretics, DM – Diabetes mellitus, HF - Heart failure, IC - Ischemic cardiomyopathy, LVH – Left ventricular hypertrophy, MI - Myocardial infarction, NR – Not reported, S – Stroke, SA – Salicylic acid, SAH – Systemic arterial hypertension, Sm – Smoking, St – Statins

|                                  |            |           |                                  |                                               |      |      |      |                                                 |           |     |                                                   |
|----------------------------------|------------|-----------|----------------------------------|-----------------------------------------------|------|------|------|-------------------------------------------------|-----------|-----|---------------------------------------------------|
| Jahangard, 2014 (32)             | Parallel   | Full text | Manic episode                    | Allopurinol 600mg vs Placebo                  | 34.4 | 61.4 | NR   | HF 0, IC 0, MI 0, S 0, DM 0, CKD 0, Sm 0, SAH 0 | NR        | 28  | No                                                |
| Jalal, 2016 (33)                 | Parallel   | Full text | CKD, hyperuricemia               | Allopurinol 300mg vs Placebo                  | 57.4 | 79.9 | 0    | HF 0, CKD 100, DM 61, Sm 17.5 CVD 45            | NR        | 90  | No (National Institutes of Health)                |
| Jalalzadeh, 2012 (34)            | Cross-over | Full text | Hemodialysis, hyperuricemia      | Allopurinol 100mg vs standard treatment       | 55.9 | 62.3 | NR   | CDK 100, SAH 100                                | ACEi 54.7 | 90  | No (Iran's Zanjan University of Medical Sciences) |
| Jarnerot, 2000 (35)              | Parallel   | Full text | Ulcerative colitis               | Allopurinol 200mg vs Placebo                  | 44   | 52.8 | NR   | Sm 11.4                                         | NR        | 365 | No                                                |
| Jitapunkul, 1991 (36)            | Cross-over | Full text | DM                               | Allopurinol 300mg vs Placebo                  | 51.3 | NR   | NR   | CKD 100, HF 0, IC 0, MI 0, S 0, DM 100          | D 0, SA 0 | 84  | No                                                |
| Joelsson, 2001 (37)              | Parallel   | Full text | Ulcerative colitis               | Allopurinol 200mg vs Placebo                  | 38   | 59.8 | NR   | NR                                              | NR        | 730 | No (Swedish Medical Research Council)             |
| Kamatani late phase 2, 2011 (38) | Parallel   | Full text | Gout, Asymptomatic hyperuricemia | Febuxostat 20-40-60-80 vs Placebo             | 53.6 | 97   | 59.3 | CKD 0, SAH 48.7, DM 10.5                        | NR        | 120 | Yes (Teijin Pharma Ltd.)                          |
| Kamatani Phase 3, 2011 (39)      | Parallel   | Full text | Hyperuricemia                    | Febuxostat 20mg vs Febuxostat 40mg vs Placebo | 47.5 | 100  | 100  | SAH 35.2 CKD 7.8 DM 10.7                        | NR        | 60  | Yes (Teijin Pharma Ltd.)                          |

ACEi – Angiotensin-converting enzyme inhibitors, ARB – Angiotensin II receptor blockers, CKD - Chronic kidney disease, CVD – Cardiovascular disease, D – Diuretics, DM – Diabetes mellitus, HF - Heart failure, IC - Ischemic cardiomyopathy, LVH – Left ventricular hypertrophy, MI - Myocardial infarction, NR – Not reported, S – Stroke, SA – Salicylic acid, SAH – Systemic arterial hypertension, Sm – Smoking, St – Statins

|                          |          |           |                                         |                                       |      |       |    |                                                 |                                |      |                                                          |
|--------------------------|----------|-----------|-----------------------------------------|---------------------------------------|------|-------|----|-------------------------------------------------|--------------------------------|------|----------------------------------------------------------|
| Kanbay, 2011 (40)        | Parallel | Full text | Asymptomatic hyperuricemia              | Allopurinol 300mg vs No treatment     | 52.1 | 50.2  | 0  | HF 0, IC 0, CKD 0, MI 0, S 0, SAH 0, DM 0, Sm 0 | ACEi/ARB 0, St 0               | 120  | No                                                       |
| Kao, 2011 (41)           | Parallel | Full text | LVH, CKD                                | Allopurinol 300mg vs Placebo          | 72.1 | 52.8  | 0  | HF 0, CKD 100, Sm 13.2                          | ACEi/ARB 73.6, D 45.3, St 77.3 | 270  | No (British Heart Foundation)                            |
| Khan, 2008 (42)          | Parallel | Full text | S, Hyperuricemia                        | Allopurinol 300mg vs Placebo          | 68.5 | 78.6  | NR | IC 25, S 100, DM 3.6, Sm 3.6                    | ACEi/ARB 64.3, D 46.4, St 89.3 | 56   | No (Chest, Heart and Stroke Scotland, Heart Research UK) |
| Lei, 2009 (43)           | Parallel | Full text | CKD, hyperuricemia                      | Allopurinol 100-200mg vs no Placebo   | 49   | 68.4  | NR | CKD 100                                         | NR                             | 365  | NR                                                       |
| Liu, 2007 (44)           | Parallel | Full text | CKD, hyperuricemia                      | Allopurinol 100-300mg vs No treatment | 46.0 | 61.6  | NR | CKD 100                                         | NR                             | 365  | NR                                                       |
| Liu, 2015 (45)           | Parallel | Full text | Type2 diabetes                          | Allopurinol 100mg vs no treatment     | 50.4 | 46.02 | 0  | CKD 0, SAH 0, DM 100, Sm 34                     | St 33.7, AS 48.6               | 1095 | NR                                                       |
| Machado-Vieira, 2008(46) | Parallel | Full text | Bipolar disorder                        | Allopurinol 600mg vs Placebo          | 28.1 | 41.7  | NR | NR                                              | NR                             | 30   | No (Stanley Medical Research Institute)                  |
| Madero, 2015 (47)        | Parallel | Full text | Overweight and prehypertensive subjects | Allopurinol 300mg vs Placebo          | 46.1 | 61.1  | 0  | HF 0, IC 0, CKD 0, MI 0, S 0, SAH 0, DM 0       | NR                             | 28   | NR                                                       |
| Mao, 2015 (48)           | Parallel | Full text | Coronary Heart Disease                  | Allopurinol 300mg vs Placebo          | 46   | 57.1  | NR | IC 54                                           | NR                             | 730  | NR                                                       |

ACEi – Angiotensin-converting enzyme inhibitors, ARB – Angiotensin II receptor blockers, CKD - Chronic kidney disease, CVD – Cardiovascular disease, D – Diuretics, DM – Diabetes mellitus, HF - Heart failure, IC - Ischemic cardiomyopathy, LVH – Left ventricular hypertrophy, MI - Myocardial infarction, NR – Not reported, S – Stroke, SA – Salicylic acid, SAH – Systemic arterial hypertension, Sm – Smoking, St – Statins

|                                       |            |                           |                       |                                            |      |      |     |                                             |               |     |                                                                            |
|---------------------------------------|------------|---------------------------|-----------------------|--------------------------------------------|------|------|-----|---------------------------------------------|---------------|-----|----------------------------------------------------------------------------|
| Modabber, 2009 (49)                   | Cross-over | Full text                 | Schizophrenia         | Allopurinol 600mg vs Placebo               | 36.2 | NR   | 0   | HF 0, IC 0, CKD 0, MI 0, S 0, SAH 0, DM 0   | NR            | 180 | No (Kurdistan University of Medical Sciences Vice Chancellor for research) |
| Momeni, 2010 (50)                     | Parallel   | Full text                 | DM, CKD               | Allopurinol 100mg vs Placebo               | 57.7 | 45   | NR  | DM 100, CKD 100                             | ACEi/ARB 100  | 120 | No                                                                         |
| Muir, 2008 (51)                       | Parallel   | Full text                 | Acute ischemic stroke | Allopurinol 100-300mg vs Placebo           | 69.9 | 42.3 | NR  | S 100, DM 12                                | NR            | 42  | No (Glasgow West Endowments Fund.)                                         |
| NCT01078389, 2014 (52)                | Parallel   | ClinicalTrials            | Gout                  | Topiroxostat 40/80mg vs Placebo            | 50.8 | 91.7 | 100 | Sm 18.1, CKD 71.6                           | NR            | 730 | Yes (Takeda)                                                               |
| NCT01350388 / Beddhu, 2016 (53)       | Parallel   | ClinicalTrials /Full text | CKD, DM               | Febuxostat 80mg vs Placebo                 | 68   | 65   | NR  | CKD 100, DM 100                             | NR            | 180 | No (University of Utah)                                                    |
| NCT01496469, 2015 (54)                | Parallel   | ClinicalTrials            | SAH, hyperuricemia    | Febuxostat 80mg vs Placebo                 | 53.6 | 80.9 | 0   | Sm14.8, SAH 100, HF0, CIO,S 0, MIO, CKD62.8 | ACEi/ARB 44.6 | 45  | Yes (Takeda)                                                               |
| NCT02128490 / Gunawardhana, 2016 (55) | Parallel   | ClinicalTrials            | Gout, CKD             | Febuxostat 40l, 40X, 80l, 80Xmg vs Placebo | 63.1 | 70.8 | 100 | Sm 10                                       | NR            | 90  | Yes (Takeda)                                                               |
| NCT02139046 / Saag, 2016 (56)         | Parallel   | ClinicalTrials            | Gout                  | Febuxostat 40l-40X-80l-80Xmg vs Placebo    | 55.1 | 88.4 | 100 | Sm 16                                       | NR            | 90  | Yes (Takeda)                                                               |

ACEi – Angiotensin-converting enzyme inhibitors, ARB – Angiotensin II receptor blockers, CKD - Chronic kidney disease, CVD – Cardiovascular disease, D – Diuretics, DM – Diabetes mellitus, HF - Heart failure, IC - Ischemic cardiomyopathy, LVH – Left ventricular hypertrophy, MI - Myocardial infarction, NR – Not reported, S – Stroke, SA – Salicylic acid, SAH – Systemic arterial hypertension, Sm – Smoking, St – Statins

|                       |            |           |                                 |                                                   |      |      |     |                                           |                          |    |                                                                                                                                                                              |
|-----------------------|------------|-----------|---------------------------------|---------------------------------------------------|------|------|-----|-------------------------------------------|--------------------------|----|------------------------------------------------------------------------------------------------------------------------------------------------------------------------------|
| Noman, 2010<br>(57)   | Cross-over | Full text | Stable chronic angina pectoris  | Allopurinol 600mg vs placebo                      | 64.6 | 83   | 0   | SAH 45, DM 12, IC 100, HF 15, Sm 8        | ACEi 56.6, St 97, SA 100 | 42 | No (British Heart Foundation)                                                                                                                                                |
| Parmley 1992<br>(58)  | Parallel   | Full text | Ischemic cardiomyopathy         | Allopurinol 300mg vs Placebo                      | 54.5 | 73.5 | NR  | IC 100, CKD 0, SAH 52.1, DM 30.5, Sm 79.3 | NR                       | 90 | Yes (Burroughs Wellcome Company)                                                                                                                                             |
| Poiley, 2016<br>(59)  | Parallel   | Full text | Gout                            | Allopurinol 300mg vs Placebo                      | 52.1 | 95.1 | 100 | HF 0, CKD 0, MI 0, S 0                    | NR                       | 90 | Yes (CymaBay Therapeutics)                                                                                                                                                   |
| Puntoni, 2013<br>(60) | Parallel   | Full text | Colorectal Adenoma              | Allopurinol 200mg vs Allopurinol 100mg vs Placebo | 61.3 | 53.4 | 0   | Sm 11                                     | NR                       | 28 | Yes (Italian League Against Cancer, the Ligurian Public Health Regional Agency, Cassa di Risparmio di Genova e Imperia—CA.RI.GE. Foundation, and Edoardo Garrone Foundation) |
| Rassi, 2007 (61)      | Parallel   | Full text | Chronic phase of Chagas disease | Allopurinol 900mg vs Placebo                      | 48.5 | 45.7 | NR  | CKD 0, HF 0, IC 0, LVH 0, MI 0,           | D 0                      | 60 | No (UNDP/WORLD BANK/WHO SPECIAL PROGRAMME)                                                                                                                                   |

ACEi – Angiotensin-converting enzyme inhibitors, ARB – Angiotensin II receptor blockers, CKD - Chronic kidney disease, CVD – Cardiovascular disease, D – Diuretics, DM – Diabetes mellitus, HF - Heart failure, IC - Ischemic cardiomyopathy, LVH – Left ventricular hypertrophy, MI - Myocardial infarction, NR – Not reported, S – Stroke, SA – Salicylic acid, SAH – Systemic arterial hypertension, Sm – Smoking, St – Statins



|                       |          |           |                              |                                                            |      |      |     |                                                            |                                     |     |                                                         |
|-----------------------|----------|-----------|------------------------------|------------------------------------------------------------|------|------|-----|------------------------------------------------------------|-------------------------------------|-----|---------------------------------------------------------|
| Rekhranj, 2013 (62)   | Parallel | Full text | Ischemic heart disease       | Allopurinol 600mg vs Placebo                               | 64.5 | 90   | 0   | Sm 16.6, CKD 0, SAH 65, DM 11.6, MI 50, HF 0, IC 100, S 10 | ACEi 58.3, ARB 16.6, St 93, SA 91.6 | 270 | No (Medical Research Council - (UK)                     |
| Rentoukas, 2010 (63)  | Parallel | Full text | STEMI undergoing primary PCI | Allopurinol 400-100mg vs Placebo                           | 63.9 | 72.5 | NR  | IC 100, MI 17.45, SAH 25, DM 22.5, Sm 27.5                 | D 22.5                              | 30  | NR                                                      |
| Robertson, 2015 (64)  | Parallel | Full text | Peripheral Arterial Disease  | Allopurinol 600mg vs Placebo                               | 68.4 | 78   | NR  | HF 0, IC 0, CKD 0, Sm 26                                   | ACEi/ARB 70, St 94, SA 94           | 180 | No (British Heart Foundation)                           |
| Rosenfeld, 1974 (65)  | Parallel | Full text | Hyperuricemic                | No fixed dose                                              | 50.3 | NR   | NR  | CKD 68.3, SAH 78                                           | CKD 68.3, SAH 70                    | 900 | NR                                                      |
| Saag, 2016 (66)       | Parallel | Full text | CKD,gout                     | Febuxostat 60-40-80mg vs Placebo                           | 65.7 | 80.2 | 100 | CKD 100, SAH 95.8, DM 44.8                                 | ACEi/ARB 65.6, SA 54.2              | 365 | Yes (Takeda)                                            |
| Sarris, 2007 (67)     | Parallel | Abstract  | CKD                          | Allopurinol 150mg vs no treatment                          | 49.8 | 47.2 | 0   | HF 0, CKD 100                                              | NR                                  | 365 | NR                                                      |
| Schumacher, 2008 (68) | Parallel | Full text | Hyperuricemia and gout       | Allopurinol 300-100mg vsFebuxostat 80-120-240mg vs Placebo | 51.7 | 93.7 | 100 | CVD 13,4, SAH 46.7                                         | SA 17                               | 210 | Yes (Takeda Global Research & Development Center, Inc.) |

ACEi – Angiotensin-converting enzyme inhibitors, ARB – Angiotensin II receptor blockers, CKD - Chronic kidney disease, CVD – Cardiovascular disease, D – Diuretics, DM – Diabetes mellitus, HF - Heart failure, IC - Ischemic cardiomyopathy, LVH – Left ventricular hypertrophy, MI - Myocardial infarction, NR – Not reported, S – Stroke, SA – Salicylic acid, SAH – Systemic arterial hypertension, Sm – Smoking, St – Statins

|                           |          |           |                        |                                              |      |      |    |                                                                     |                                                                |     |                                                                             |
|---------------------------|----------|-----------|------------------------|----------------------------------------------|------|------|----|---------------------------------------------------------------------|----------------------------------------------------------------|-----|-----------------------------------------------------------------------------|
| Segal, 2015 (69)          | Parallel | Full text | SAH<br>CKD             | Allopurinol 300-<br>600mg vs<br>Placebo      | 50.9 | 28   | 0  | SAH 100                                                             | ACEi/ARB<br>36.5, D 48.2                                       | 67  | No (NIH/NCATS and<br>Divison of<br>Nephology<br>Gatorade Research<br>Funds) |
| Separham, 2016<br>(70)    | Parallel | Full text | MI                     | Allopurinol<br>100mg vs<br>Placebo           | 60.6 | 77.9 | NR | MI 100, DM<br>25.7, SAH 42.1,<br>Sm 42.1                            | NR                                                             | 30  | No                                                                          |
| Shen, 2010 (71)           | Parallel | Full text | CKD,<br>hyperuricemia  | Allopurinol 100-<br>200mg vs No<br>treatment | 47.3 | 67.3 | 0  | CKD 100                                                             | NR                                                             | 365 | NR                                                                          |
| Shi, 2012 (72)            | Parallel | Full text | IgA nephropathy        | Allopurinol 100-<br>300mg vs No<br>treatment | 39.9 | 55   | NR | SAH 45                                                              | ACEi/ARB 0                                                     | 180 | No (Scientific and<br>Technologic<br>Commitee of<br>Guangdong<br>Province)  |
| Sircar, 2015 (73)         | Parallel | Full text | CKD,<br>hyperuricemia  | Febuxostat<br>40mg vs<br>Placebo             | 57.3 | 70.7 | 0  | CKD 100, SAH<br>97.9, DM 37.2,<br>IC 37.7                           | ACEi/ARB<br>65.6, D 18.5                                       | 180 | No                                                                          |
| Siu, 2006 (74)            | Parallel | Full text | CDK,<br>Hyperuricemic  | Allopurinol 200-<br>100mg vs<br>Placebo      | 48.2 | 43.1 | 0  | CKD 94.4, SAH<br>78.3, DM 25.5                                      | ACEi 53.7<br>ARB 24.0 St<br>33.7                               | 360 | No                                                                          |
| Szwejkowski,<br>2013 (75) | Parallel | Full text | Type 2 Diabetes<br>LVH | Allopurinol<br>600mg vs<br>Placebo           | 64.6 | 61   | 0  | CKD 0, HF 100,<br>IC 10.2, S 10.67,<br>SAH 89.8, DM<br>100, Sm 13.6 | ACEi 49.15,<br>ARB 27.12, D<br>28.81; St<br>84.75, SA<br>47.46 | 270 | No (Diabetes UK)                                                            |

ACEi – Angiotensin-converting enzyme inhibitors, ARB – Angiotensin II receptor blockers, CKD - Chronic kidney disease, CVD – Cardiovascular disease, D – Diuretics, DM – Diabetes mellitus, HF - Heart failure, IC - Ischemic cardiomyopathy, LVH – Left ventricular hypertrophy, MI - Myocardial infarction, NR – Not reported, S – Stroke, SA – Salicylic acid, SAH – Systemic arterial hypertension, Sm – Smoking, St – Statins

|                        |          |           |                             |                                          |      |      |    |                                                                  |                             |     |                                         |
|------------------------|----------|-----------|-----------------------------|------------------------------------------|------|------|----|------------------------------------------------------------------|-----------------------------|-----|-----------------------------------------|
| Taheraghdam, 2014 (76) | Parallel | Full text | Acute ischemic stroke       | Allopurinol 200mg vs Placebo             | 69   | 35.7 | 0  | HF 0, IC 28.6, CKD 0, S 100, MI 12.8, SAH 35.7, DM 62.8, Sm 14.3 | ACEi/ARB 35.7, D 0, St 100  | 90  | No                                      |
| Takir, 2015 (77)       | Parallel | Full text | Hyperuricemia               | Allopurinol 300mg vs Placebo             | 48.4 | 33.8 | 0  | DM 0, CKD 0, SAH 52.9                                            | ACEi/ARB 53.7               | 90  | No (Istambul Medeniyet University)      |
| Tan, 2014 (78)         | Parallel | Full text | CKD                         | Allopurinol 66.6 - 200mg vs No treatment | NR   | NR   | NR | CKD 100                                                          | NR                          | 730 | NR                                      |
| Tanaka, 2015 (79)      | Parallel | Full text | CDK, Hyperuricemic          | Febuxostat 40mg vs Placebo               | 68.2 | 87.5 | 0  | CKD 100, DM 6.7, SAH 42.5, Sm 20, CVD 11.1                       | NR                          | 90  | NR                                      |
| Tani, 2015 (80)        | Parallel | Full text | Hyperuricemic, Hypertension | Febuxostat 10mg vs Placebo               | 68   | 88   | NR | CKD 43, IC 32, SAH 100, DM 32, Sm 8.3                            | ACEi/ARB 65, D 25, St 53    | 180 | No                                      |
| Togha, 2007 (81)       | Parallel | Full text | Epilepsy                    | Allopurinol 300mg vs Placebo             | 24.9 | 55.3 | 0  | HF 0, CKD 0, MI 0, CI 0, S 0, SAH 0, DM 0                        | ACEi/ARB 0, D 0, SA 0, St 0 | 180 | No (Iran Epilepsy Society)              |
| Tsuruta, 2015 (82)     | Parallel | Full text | Hemodialysis, hyperuricemia | Febuxostat 10mg vs Placebo               | 68.2 | 64.1 | 0  | SAH 79.2, DM 41.4, CKD 100, IC 26.3                              | NR                          | 30  | No ( Global Forum on Home Hemodialysis) |
| Usharani, 2016 (83)    | Parallel | Full text | Hyperuricemia               | Febuxostat 40mg vs Placebo               | 53   | 68   | NR | CKD 0                                                            | D 0, SA 0                   | 180 | No                                      |

ACEi – Angiotensin-converting enzyme inhibitors, ARB – Angiotensin II receptor blockers, CKD - Chronic kidney disease, CVD – Cardiovascular disease, D – Diuretics, DM – Diabetes mellitus, HF - Heart failure, IC - Ischemic cardiomyopathy, LVH – Left ventricular hypertrophy, MI - Myocardial infarction, NR – Not reported, S – Stroke, SA – Salicylic acid, SAH – Systemic arterial hypertension, Sm – Smoking, St – Statins

|                   |          |           |                                                         |                                   |      |      |    |                                        |               |     |                                         |
|-------------------|----------|-----------|---------------------------------------------------------|-----------------------------------|------|------|----|----------------------------------------|---------------|-----|-----------------------------------------|
| Wang, 2012 (84)   | Parallel | Full text | CKD, hyperuricemia                                      | Allopurinol 300mg vs No treatment | 46.2 | 72.8 | NR | IC 0, Sm 22, SAH 27,1, DM 27,1, CKD 0, | D 0, SA 0     | 90  | Impossible to extract                   |
| Wang, 2015 (85)   | Parallel | Full text | Atherosclerosis hyperuricemia                           | Allopurinol 300mg vs no treatment | 47.8 | 63.5 | NR | CKD 0                                  | NR            | 90  | NR                                      |
| Weiser, 2012 (86) | Parallel | Full text | Schizophrenia or schizoaffective disorder               | Allopurinol 600mg vs Placebo      | 42.6 | 51.5 | NR | NR                                     | NR            | 60  | No (Stanley Medical Research Institute) |
| Weiser, 2014 (87) | Parallel | Full text | Bipolar disorder                                        | Allopurinol 300mg vs Placebo      | 46.7 | 32.8 | NR | NR                                     | NR            | 42  | No (Stanley Medical Research Institute) |
| Yin, 2015 (88)    | Parallel | Full text | Angina pectoris, hyperuricemia                          | Allopurinol 400mg vs no treatment | 66.9 | 55.6 | 0  | DM 25.3, SHA 32.9, Sm 46.8             | SA 100        | 90  | NR                                      |
| Zhang, 2012 (89)  | Parallel | Full text | Acute coronary syndromes, hyperuricemia, hyperlipidemia | Allopurinol 300mg vs no treatment | NR   | 75   | 0  | IC 100, CKD 0, HF 0                    | NR            | 365 | NR                                      |
| Zhou, 2009 (90)   | Parallel | Full text | CKD, hyperuricemia                                      | Allopurinol 100-200mg vs Placebo  | 58.9 | 43   | 0  | CKD 100, DM 32.5, SAH 52.3             | ACEi/ARB 52.3 | 180 | NR                                      |
| Ziaee, 2006 (91)  | Parallel | Full text | Chronic nonbacterial prostatitis                        | Allopurinol 100mg vs Placebo      | 33.3 | 100  | NR | NR                                     | NR            | 90  | No                                      |

ACEi – Angiotensin-converting enzyme inhibitors, ARB – Angiotensin II receptor blockers, CKD - Chronic kidney disease, CVD – Cardiovascular disease, D – Diuretics, DM – Diabetes mellitus, HF - Heart failure, IC - Ischemic cardiomyopathy, LVH – Left ventricular hypertrophy, MI - Myocardial infarction, NR – Not reported, S – Stroke, SA – Salicylic acid, SAH – Systemic arterial hypertension, Sm – Smoking, St – Statins

| <b>Study</b>          | <b>Primary outcome</b>                                                                        |
|-----------------------|-----------------------------------------------------------------------------------------------|
| Akhondzadeh, 2005 (1) | Mean decrease in Positive and Negative Syndrome Scale score (PANSS) over 8 weeks.             |
| Akhondzadeh, 2006 (2) | Mean decrease in the Young Mania Rating Scale score from baseline over 8 weeks.               |
| Becker, 2005 (3)      | Proportion of subjects in each treatment group with sUA levels 6.0 mg/dl on day 28.           |
| Borgi, 2017 (4)       | Kidney-specific and systemic RAS (renin-angiotensin system) activity at 8 weeks.              |
| Bowden, 2013(5)       | Colesterol LDL, HDL, Triglycerides, and Apo B levels at 8 weeks.                              |
| Brunstein, 2005 (6)   | Total, positive, negative and general PANNS score over 6 weeks.                               |
| Chen, 2009 (7)        | Changes of serum uric acid level and NYHA class of heart function at 3 months.                |
| Chen, 2014 (8)        | Changes of serum uric acid level, blood pressure and C-reactive protein at 9 months.          |
| Cingolani, 2006 (9)   | Change in LVEF, uric acid, and 6-minute walk distance at 4 weeks.                             |
| Dawson, 2009 (10)     | Cerebrovascular reactivity difference between baseline and 3 months.                          |
| Deng, 2010 (11)       | Doubling of serum creatinine, advance to end-stage renal disease, and mortality at 12 months. |
| Dickerson, 2009 (12)  | PANSS score over 8 weeks.                                                                     |
| Dogan, 2011 (13)      | Brachial artery flow-mediated dilatation (FMD) and nitrate-                                   |

|                       |                                                                                                                                                                                                         |
|-----------------------|---------------------------------------------------------------------------------------------------------------------------------------------------------------------------------------------------------|
|                       | induced dilatation (NID) at 12 weeks.                                                                                                                                                                   |
| Eddeland, 1983 (14)   | The frequency of need for indwelling urethral catheter attention including catheter change over time.                                                                                                   |
| Ettinger, 1986 (15)   | Incidence of recurrent calcium oxalate calculi of the kidney over 24 weeks.                                                                                                                             |
| Fan, 2012 (16)        | YMRS (Young Mania Rating Scale) at week 6.                                                                                                                                                              |
| Feuerman, 1973 (17)   | Extent and severity of psoriatic lesions at 56 days.                                                                                                                                                    |
| George, 2006 (18)     | Endothelial function was assessed by standard forearm venous occlusion plethysmography at 28 days.                                                                                                      |
| Gibson, 1982 (19)     | Decline in renal function over 2 years.                                                                                                                                                                 |
| Givertz, 2015 (20)    | Composite end point based on survival, worsening HF, and patient global assessment at 24 weeks.                                                                                                         |
| Goicoechea, 2010 (21) | Incidence of hospitalizations, cardiovascular events, end-stage renal disease requiring dialysis therapy, and mortality at 24 months.                                                                   |
| Goldfarb, 2013 (22)   | Percent change from baseline to month 6 in 24-hour urinary uric acid.                                                                                                                                   |
| Greig, 2011 (23)      | Malondialdehyde (MDA), extracellular superoxide dismutase (ecSOD) activity, flow-dependent endothelial-mediated vasodilation (FDD), and functional capacity by 6-minute walk test (6MWT) after 4 weeks. |
| Guo, 2015 (24)        | The levels of serum uric acid and neurological function at week 12.                                                                                                                                     |

|                                  |                                                                                                                     |
|----------------------------------|---------------------------------------------------------------------------------------------------------------------|
| Guo, 2016 (25)                   | The scores of Barthel index ( BI) and modified Rankin Scale ( mRS) were evaluated at 30 days and 90 days.           |
| Hare, 2008 (26)                  | A composite end point comprising heart failure morbidity, mortality, and quality of life at week 24.                |
| Higgins, 2014 (27)               | Change in Central blood pressure (CBP), arterial stiffness, and carotid intima-media thickness (CIMT) at 12 months. |
| Hill, 2015 (28)                  | Protocol defined days to resolution of acute gout.                                                                  |
| Hosoya, 2014 (29)                | Percent change of the serum urate level and eGFR from the baseline to the final visit at week 22.                   |
| Hosoya, 2016 fase 2a (30)        | Percent change in serum urate level from baseline to the final visit at week 8.                                     |
| Hosoya, 2016 fase 2b (31)        | Serum urate reduction rate from baseline to the final visit at week 16.                                             |
| Jahangard, 2014 (32)             | Change in YMRS (Young Mania Rating Scale) over 4 weeks.                                                             |
| Jalal, 2016 (33)                 | Change in brachial artery flow-mediated dilation (BA-FMD) from the week 0 to week 12 visits.                        |
| Jalalzadeh, 2012 (34)            | Lowering of systolic and diastolic blood pressure at 12 weeks.                                                      |
| Jarnerot, 2000 (35)              | Maintenance of remission of ulcerative colitis over 12 months.                                                      |
| Jitapunkul, 1991 (36)            | Levels of hemoglobin A1c, plasma glucose in 75-gr oral tolerance test, and insulin levels at week 12.               |
| Joelsson, 2001 (37)              | Incidence of pouchitis over 24 months.                                                                              |
| Kamatami late phase 2, 2011 (38) | Percentage of patients achieving serum uric acid levels 6.0 mg/dL or less at 16 weeks.                              |

|                             |                                                                                                                           |
|-----------------------------|---------------------------------------------------------------------------------------------------------------------------|
| Kamatani Phase 3, 2011 (39) | Percentage of patients achieving serum uric acid levels 6.0 mg/dL or less at 8 weeks.                                     |
| Kanbay, 2011 (40)           | Flow-mediated dilation (FMD) and estimated glomerular filtration rate (eGFR) change from baseline to 16 weeks.            |
| Kao, 2011 (41)              | Left ventricular mass index (LVMI), endothelial function and central arterial stiffness change from baseline to 9 months. |
| Khan, 2008 (42)             | Change in arterial wave reflection, determined from the augmentation index (Aix), from baseline to week 8.                |
| Lei, 2009 (43)              | Creatinine level and incidence of renal function deterioration at 12 months.                                              |
| Liu, 2007 (44)              | Increase if serum creatinine at 12 months.                                                                                |
| Liu, 2015 (45)              | Change in carotid IMT (intima-media thickness) after 3 years of treatment.                                                |
| Machado-Vieira, 2008 (46)   | Change in Young Mania Rating Scale (YMRS) over 4 weeks.                                                                   |
| Madero, 2015 (47)           | Clinic blood pressure reduction at 8 weeks.                                                                               |
| Mao, 2015 (48)              | BaPWV (brachial—ankle pulse wave velocity) and ABI (ankle brachial index) at 12 and 24 months.                            |
| Modabber, 2009 (49)         | Changes in the mean Positive and Negative Syndrome Scale (PANSS) score at 6 months.                                       |
| Momeni, 2010 (50)           | Proteinuria at 2 and 4 months.                                                                                            |
| Muir, 2008 (51)             | Change in Intercellular Adhesion Molecule-1, C-reactive protein, and IL-6 Levels at week 6.                               |
| NCT01078389, 2014 (52)      | Mean Change From Baseline to Month 24 in the Modified                                                                     |



|                                       |                                                                                                                               |
|---------------------------------------|-------------------------------------------------------------------------------------------------------------------------------|
|                                       | Sharp/Van Der Heijde Erosion Score of the Single Affected Joint                                                               |
| NCT01350388 / Beddhu 2016 (53)        | Change in Thiobarbituric Acid Reactive Substance (TBARS) Concentration in Adipose Tissue From Baseline to 24 Weeks            |
| NCT01496469, 2015 (54)                | Change From Baseline in 24-hour Mean Systolic Blood Pressure (SBP) Measured by Ambulatory Blood Pressure Monitoring at Week 6 |
| NCT02128490 / Gunawardhana, 2016 (55) | Percentage of Participants With Serum Urate <5.0 mg/dL at Month 3                                                             |
| NCT02139046 / Saag, 2016 (56)         | Percentage of Participants With Serum Urate <5.0 mg/dL at Month 3                                                             |
| Noman, 2010 (57)                      | Primary endpoint was the time to ST depression during exercise tolerance test at 6 weeks.                                     |
| Parmley 1992 (58)                     | Infarct extension during the period of follow-up.                                                                             |
| Poiley, 2016 (59)                     | Incidence of gout flares over 12 weeks.                                                                                       |
| Puntoni, 2013 (60)                    | Change of Ki-67 labeling index in adenomatous tissue at 4 weeks.                                                              |
| Rassi, 2007 (61)                      | Clearance of negativation serology for chagas disease over 2 years.                                                           |
| Rekhranj, 2013 (62)                   | Change in left ventricular mass accessed by CMR (cardiac magnetic resonance) imaging at 9 months.                             |
| Rentoukas, 2010 (63)                  | Effect on cardiac biomarkers, ST-E recovery, and major adverse cardiovascular events over 30 days.                            |
| Robertson, 2015 (64)                  | Change in exercise capacity on treadmill testing at 6 months.                                                                 |
| Rosenfeld, 1974 (65)                  | Creatinine and creatinine clearance at the end of the study.                                                                  |

|                        |                                                                                                                                                         |
|------------------------|---------------------------------------------------------------------------------------------------------------------------------------------------------|
| Saag, 2016 (66)        | Change from baseline to month 12 in serum creatinine.                                                                                                   |
| Sarris, 2007 (67)      | Serum creatinine at 12 months.                                                                                                                          |
| Schumacher, 2008 (68)  | Proportion of subjects with the last 3 monthly serum urate levels < 6.0 mg/dl at 28 weeks.                                                              |
| Segal, 2015 (69)       | Change in clinic systolic blood pressure at 4 weeks.                                                                                                    |
| Separham, 2016 (70)    | Resolution of 50% of ST elevation 90 minutes after thrombolytic therapy.                                                                                |
| Shen, 2010 (71)        | Serum creatinine levels at the end of 12 months.                                                                                                        |
| Shi, 2012 (72)         | Change in renal function assessed as changes in eGFR at 6 months.                                                                                       |
| Sircar, 2015 (73)      | Proportion of patients showing a 10% decline in estimated glomerular filtration rate (eGFR) from baseline at 6 months.                                  |
| Siu, 2006(74)          | Prevalence of stable kidney function with less than 40% increase in serum creatinine level at the end of 12 months.                                     |
| Szwejkowski, 2013 (75) | Reduction in LVM as calculated by cardiac magnetic resonance imaging at baseline and at 9 months.                                                       |
| Taheraghdam, 2014 (76) | Functional outcome evaluated using a modified Rankin scale at the 3 months.                                                                             |
| Takir, 2015 (77)       | Improvement in insulin resistance defined by homeostatic model assessment of insulin resistance (HOMA-IR) at 3 months.                                  |
| Tan, 2014 (78)         | Changes in blood pressure, blood uric acid, hypersensitive c-reactive protein, bladder inhibition-C and glomerular filtration rate (eGFR) over 2 years. |

|                     |                                                                                                        |
|---------------------|--------------------------------------------------------------------------------------------------------|
| Tanaka, 2015 (79)   | Mean serum uric acid at 12 weeks.                                                                      |
| Tani, 2015 (80)     | Change in the plasma renin activity (PRA) and plasma aldosterone concentration at 6 months.            |
| Togha, 2007 (81)    | Mean number of seizures per month and duration of seizure attacks over 6 months.                       |
| Tsuruta, 2015 (82)  | FMD (Flow-mediated dilation) after the 4-week study period.                                            |
| Usharani, 2016 (83) | Absolute and mean percentage reduction in serum uric acid levels from baseline to the end of 24 weeks. |
| Wang, 2012 (84)     | Change in brachial-ankle pulse wave velocity (baPWV) and ankle-brachial index (ABI) at 3 months.       |
| Wang, 2015 (85)     | ABI and baPWV at 3 months.                                                                             |
| Weiser, 2012 (86)   | Total PANSS score at week 8.                                                                           |
| Weiser, 2014 (87)   | Total YMRS score at 6 weeks.                                                                           |
| Yin, 2015 (88)      | Thrombosis in myocardial infarction (TIMI) score at 3 months.                                          |
| Zhang, 2012 (89)    | Incidence of cardiovascular events over 1 year.                                                        |
| Zhou, 2009 (90)     | Serum creatinine and glomerular filtration rate at 6 months.                                           |
| Ziaee, 2006 (91)    | Change in total symptom score over 3 months.                                                           |

## REFERENCES

1. Akhondzadeh S, Milajerdi MR, Amini H, Moinalghorabaei M. A double-blind, randomized, placebo-controlled study of allopurinol as adjunctive treatment for acute mania in hospitalized bipolar patients. *Br J Clin Pharmacol* 2005;59:634.
2. Akhondzadeh S, Milajerdi MR, Amini H, Tehrani-Doost M. Allopurinol as an adjunct to lithium and haloperidol for treatment of patients with acute mania: a double-blind, randomized, placebo-controlled trial. *Bipolar Disord* 2006;8:485-9.
3. Becker MA, Schumacher HR, Wortmann RL, MacDonald PA, Palo WA, Eustace D, et al. Febuxostat, a novel nonpurine selective inhibitor of xanthine oxidase: a twenty-eight-day, multicenter, phase II, randomized, double-blind, placebo-controlled, dose-response clinical trial examining safety and efficacy in patients with gout. *Arthritis Rheum*; 2005:916-23.
4. Borgi L, McMullan C, Wohlhueter A, Curhan GC, Fisher ND, Forman JP. Effect of Uric Acid-Lowering Agents on Endothelial Function: A Randomized, Double-Blind, Placebo-Controlled Trial. *Hypertension* 2017;69:243-8.
5. Bowden RG, Shelmadine BD, Moreillon JJ, Deike E, Griggs JO, Wilson RL, et al. Effects of uric acid on lipid levels in CKD patients in a randomized controlled trial. *Cardiovasc Res* 2013;4:56-63.
6. Brunstein MG, Ghisolfi ES, Ramos FL, Lara DR. A clinical trial of adjuvant allopurinol therapy for moderately refractory schizophrenia. *J Clin Psychiatry* 2005;66:213-9.

7. Chen X, Ye M. Effects of allopurinol on cardiac function and exercise capacity in hyperuricemic patients with congestive heart failure. *Chinese Journal of Clinical Rational Drug Use* 2009;12:1-3.
8. Chen W, Zhou H. Effects of Lowering Serum Uric Acid Levels on Vascular Sclerosis in Hemodialysis Patients. *Practical Clinical Medicine* 2014;15:15-7.
9. Cingolani HE, Plastino JA, Escudero EM, Mangal B, Brown J, Perez NG. The effect of xanthine oxidase inhibition upon ejection fraction in heart failure patients: La Plata Study. *J Card Fail* 2006;12:491-8.
10. Dawson J, Quinn TJ, Harrow C, Lees KR, Walters MR. The effect of allopurinol on the cerebral vasculature of patients with subcortical stroke; a randomized trial. *Br J Clin Pharmacol* 2009;68:662-8.
11. Deng Y, Zhang P, Liu H, Jia Q. Observation on allopurinol in lowering blood uric acid for slowing the progression of chronic renal failure. *Journal of Practical Medicine* 2010;26:982-4.
12. Dickerson FB, Stallings CR, Origoni AE, Sullens A, Khushalani S, Sandson N, et al. A double-blind trial of adjunctive allopurinol for schizophrenia. *Schizophr Res* 2009;109:66-9.
13. Dogan A, Yarlioglues M, Kaya MG, Karadag Z, Dogan S, Ardic I, et al. Effect of long-term and high-dose allopurinol therapy on endothelial function in normotensive diabetic patients. *Blood Press*; 2011:182-7.

14. Eddeland A, Hedelin H. Effects of allopurinol (Zyloric(Reg.trademark)) in patients with long-term indwelling urethral catheters. *J Int Med Res*; 1983:116-9.
15. Ettinger B, Tang A, Citron JT, Livermore B, Williams T. Randomized trial of allopurinol in the prevention of calcium oxalate calculi. *N Engl J Med* 1986;315:1386-9.
16. Fan A, Berg A, Bresee C, Glassman LH, Rapaport MH. Allopurinol augmentation in the outpatient treatment of bipolar mania: a pilot study. *Bipolar disord*; 2012:206-10.
17. Feuerman EJ, Nir MA. Allopurinol in psoriasis - a double-blind study. *Br J Dermatol* 1973;89:83-6.
18. George J, Carr E, Davies J, Belch JJ, Struthers A. High-dose allopurinol improves endothelial function by profoundly reducing vascular oxidative stress and not by lowering uric acid. *Circulation* 2006;114:2508-16.
19. Gibson T, Rodgers V, Potter C, Simmonds HA. Allopurinol treatment and its effect on renal function in gout: a controlled study. *Ann Rheum Dis* 1982;41:59-65.
20. Givertz MM, Anstrom KJ, Redfield MM, Deswal A, Haddad H, Butler J, et al. Effects of Xanthine Oxidase Inhibition in Hyperuricemic Heart Failure Patients: The Xanthine Oxidase Inhibition for Hyperuricemic Heart Failure Patients (EXACT-HF) Study. *Circulation*; 2015:1763-71.

21. Goicoechea M, De Vinuesa SG, Verdalles U, Ruiz-Caro C, Ampuero J, Rincon A, et al. Effect of allopurinol in chronic kidney disease progression and cardiovascular risk. *Clin J Am Soc Nephrol* 2010;5:1388-93.
22. Goldfarb DS, MacDonald PA, Gunawardhana L, Chefo S, McLean L. Randomized controlled trial of febuxostat versus allopurinol or placebo in individuals with higher urinary uric acid excretion and calcium stones. *Clin J Am Soc Nephrol*; 2013:1960-7.
23. Greig D, Alcaino H, Castro PF, Garcia L, Verdejo HE, Navarro M, et al. Xanthine-oxidase inhibitors and statins in chronic heart failure: effects on vascular and functional parameters. *J Heart Lung Transplant* 2011;30:408-13.
24. Guo J, Ni X, Shi L, Liu Ji, Wu X, Wei W. Clinical effect of allopurinol in the treatment of acute cerebral infarction combined with hyperuricemia. *China Modern Medicine* 2015;22:114-6.
25. Guo J, Ni X, Shi L, Liu Ji, Wu X, Wei W. Effect of Allopurinol on the Prognosis in Patients with Acute Ischemic Stroke Complicated with Hyperuricemia. *Research of Traditional Chinese Medicine* 2016;29:110-1.
26. Hare JM, Mangal B, Brown J, Fisher C, Freudenberger R, Colucci WS, et al. Impact of oxypurinol in patients with symptomatic heart failure. Results of the OPT-CHF study. *J Am Coll Cardiol* 2008;51:2301-9.
27. Higgins P, Walters MR, Murray HM, McArthur K, McConnachie A, Lees KR, et al. Allopurinol reduces brachial and central blood pressure, and carotid intima-media thickness progression after ischaemic stroke and transient ischaemic attack: A randomised controlled trial. *Heart* 2014;100:1085-92.

28. Hill E, Higgs JB, Sky K, Sit M, Collamer AN, Author A, et al. Does starting allopurinol prolong acute treated gout? *Arthritis Rheum* 2013;65(Suppl 10):S730.
29. Hosoya T, Ohno I, Nomura S, Hisatome I, Uchida S, Fujimori S, et al. Effects of topiroxostat on the serum urate levels and urinary albumin excretion in hyperuricemic stage 3 chronic kidney disease patients with or without gout. *Clin Exp Nephrol* 2014;18:876-84.
30. Hosoya T, Sasaki T, Hashimoto H, Sakamoto R, Ohashi T. Clinical efficacy and safety of topiroxostat in Japanese male hyperuricemic patients with or without gout: an exploratory, phase 2a, multicentre, randomized, double-blind, placebo-controlled study. *J Clin Pharm Ther* 2016;41:298-305.
31. Hosoya T, Sasaki T, Ohashi T. Clinical efficacy and safety of topiroxostat in Japanese hyperuricemic patients with or without gout: a randomized, double-blinded, controlled phase 2b study. *Clin Rheumatol* 2016;36:649-56.
32. Jahangard L, Soroush S, Haghighi M, Ghaleiha A, Bajoghli H, Holsboer-Trachsler E, et al. In a double-blind, randomized and placebo-controlled trial, adjuvant allopurinol improved symptoms of mania in in-patients suffering from bipolar disorder. *Eur Neuropsychopharmacol* 2014;24:1210-21.
33. Jalal DI, Decker E, Perrenoud L, Nowak KL, Bispham N, Mehta T, et al. Vascular Function and Uric Acid-Lowering in Stage 3 CKD. *J Am Soc Nephrol* 2016;28(Suppl 3):943-52.



34. Jalalzadeh M, Nurcheshmeh Z, Mohammadi R, Mousavinasab N, Ghadiani MH. The effect of allopurinol on lowering blood pressure in hemodialysis patients with hyperuricemia. *J Res Med Sci* 2012;17:1039-46.
35. Jarnerot G, Strom M, Danielsson A, Kilander A, Loof L, Hultcrantz R, et al. Allopurinol in addition to 5-aminosalicylic acid based drugs for the maintenance treatment of ulcerative colitis. *Aliment Pharmacol Ther* 2000;14:1159-62.
36. Jitapunkul S, Chalaprawat M, Bunnag S, Bhuvapanich S, Kangkaya V, Pasatrat S, et al. The relationship between glucose and uric acid metabolism: influence of short term allopurinol on glucose metabolism. *J Med Assoc Thai* 1991;74:80-6.
37. Joelsson M, Andersson M, Bark T, Gullberg K, Hallgren T, Jiborn H, et al. Allopurinol as prophylaxis against pouchitis following ileal pouch-anal anastomosis for ulcerative colitis: A randomized placebo-controlled double-blind study. *Scand J Gastroenterol* 2001;36:1179-84.
38. Kamatani N, Fujimori S, Hada T, Hosoya T, Kohri K, Nakamura T, et al. Placebo-controlled double-blind dose-response study of the non-purine-selective xanthine oxidase inhibitor febuxostat (TMX-67) in patients with hyperuricemia (including gout patients) in japan: late phase 2 clinical study. *J Clin Rheumatol* 2011;17:S35-43.
39. Kamatani N, Fujimori S, Hada T, Hosoya T, Kohri K, Nakamura T, et al. Placebo-Controlled, Double-Blind Study of the Non-Purine-Selective Xanthine Oxidase Inhibitor Febuxostat (TMX-67) in Patients With Hyperuricemia Including Those With Gout in Japan: phase 3 clinical study. *J Clin Rheumatol* 2011;17:S19-S26.

40. Kanbay M, Huddam B, Azak A, Solak Y, Kadioglu GK, Kirbas I, et al. A randomized study of allopurinol on endothelial function and estimated glomerular filtration rate in asymptomatic hyperuricemic subjects with normal renal function. *Clin J Am Soc Nephrol* 2011;6:1887-94.
41. Kao MP, Ang DS, Gandy SJ, Nadir MA, Houston JG, Lang CC, et al. Allopurinol benefits left ventricular mass and endothelial dysfunction in chronic kidney disease. *J Am Soc Nephrol* 2011;22:1382-9.
42. Khan F, George J, Wong K, McSwiggan S, Struthers AD, Belch JJ. Allopurinol treatment reduces arterial wave reflection in stroke survivors. *Cardiovasc Ther*; 2008:247-52.
43. Lei J, Li S. Clinical research on allopurinol lowering of uric acid level of chronic renal disease peciant for the delay of the progression of renal disease. *Shaanxi Medical Journal* 2009;38:1191-2.
44. Liu J, Sheng D. Allopurinol in lowering serum uric acid level for the delay of the progression of chronic renal disease. *China Pharmacy* 2007;18:2524-5.
45. Liu P, Wang H, Zhang F, Chen Y, Wang D, Wang Y. The Effects of Allopurinol on the Carotid Intima-media Thickness in Patients with Type 2 Diabetes and Asymptomatic Hyperuricemia: A Three-year Randomized Parallel-controlled Study. *Intern Med* 2015;54:2129-37.

46. Machado-Vieira R, Soares JC, Lara DR, Luckenbaugh DA, Busnello JV, Marca G, et al. A double-blind, randomized, placebo-controlled 4-week study on the efficacy and safety of the purinergic agents allopurinol and dipyridamole adjunctive to lithium in acute bipolar mania. *J Clin Psychiatry* 2008;69:1237-45.
47. Madero M, Rodriguez Castellanos FE, Jalal D, Villalobos-Martin M, Salazar J, Vazquez-Rangel A, et al. A pilot study on the impact of a low fructose diet and allopurinol on clinic blood pressure among overweight and prehypertensive subjects: a randomized placebo controlled trial. *J Am Soc Hypertens* 2015;9:837-44.
48. Mao L. Prospective study of influence of blood uric acid and intervention treatment on coronary heart disease in rural area of Nanhai. *China Modern Doctor* 2015;53:8-11.
49. Modabber A, Najmedin ST. Allopurinol as an adjuvant therapy for refractory schizophrenia. *Pak J Med Sci* 2009;25:591-6.
50. Momeni A, Shahidi S, Seirafian S, Taheri S, Kheiri S. Effect of Allopurinol in Decreasing Proteinuria in Type 2 Diabetic Patients. *Iran J Kidney Dis* 2010;4:128-32.
51. Muir SW, Harrow C, Dawson J, Lees KR, Weir CJ, Sattar N, et al. Allopurinol Use Yields Potentially Beneficial Effects on Inflammatory Indices in Those With Recent Ischemic Stroke A Randomized, Double-Blind, Placebo-Controlled Trial. *Stroke* 2008;39:3303-7.

52. Takeda Pharmaceuticals. Effect of Febuxostat on Joint Damage in Hyperuricemic Subjects With Early Gout. In: ClinicalTrials.gov [Internet]. Bethesda (MD): National Library of Medicine (US). 2000- [cited 2016 Dec 27]. Available from: <https://clinicaltrials.gov/ct2/show/NCT01078389?term=nct01078389&rank=1> NLM Identifier: NCT01078389.
53. Beddhu S, Filipowicz R, Wang B, Wei G, Chen X, Roy AC, et al. A Randomized Controlled Trial of the Effects of Febuxostat Therapy on Adipokines and Markers of Kidney Fibrosis in Asymptomatic Hyperuricemic Patients With Diabetic Nephropathy. *Can J Kidney Health Dis.* 2016;5;3:2054358116675343. doi: 10.1177/2054358116675343. Also available from: <https://clinicaltrials.gov/ct2/show/NCT01350388?term=nct01350388&rank=1>.
54. Takeda Pharmaceuticals. Effect of Febuxostat on Blood Pressure. In: ClinicalTrials.gov [Internet]. Bethesda (MD): National Library of Medicine (US). 2000- [cited 2016 Dec 27]. Available from: <https://clinicaltrials.gov/ct2/show/NCT01496469?term=nct01496469&rank=1> NLM Identifier: NCT01496469.
55. Takeda Pharmaceuticals. Efficacy and Safety of Extended Release and Immediate Release Febuxostat in Participants With Gout and Moderate Renal Impairment. In: ClinicalTrials.gov [Internet]. Bethesda (MD): National Library of Medicine (US). 2000- [cited 2016 Dec 27]. Available from: <https://clinicaltrials.gov/ct2/show/NCT02128490?term=nct02128490&rank=1> NLM Identifier: NCT02128490.

56. Takeda Pharmaceuticals. Efficacy and Safety of Extended Release and Immediate Release Febuxostat in Participants With Gout. In: ClinicalTrials.gov [Internet]. Bethesda (MD): National Library of Medicine (US). 2000- [cited 2016 Dec 27]. Available from: <https://clinicaltrials.gov/ct2/show/NCT02139046?term=nct02139046&rank=1> NLM Identifier: NCT02139046.
57. Noman A, Ang DSC, Ogston S, Lang CC, Struthers AD. Effect of high-dose allopurinol on exercise in patients with chronic stable angina: a randomised, placebo controlled crossover trial. *Lancet* 2010;375:2161-7.
58. Parmley LF, Mufti AG, Downey JM. Allopurinol therapy of ischemic heart disease with infarct extension. *Can J Cardiol* 1992;8:280-6.
59. Poiley J, Steinberg AS, Choi YJ, Davis CS, Martin RL, McWherter CA, et al. A Randomized, Double-Blind, Active- and Placebo-Controlled Efficacy and Safety Study of Arhalofenate for Reducing Flare in Patients With Gout. *Arthritis Rheumatol* 2016;68:2027-34.
60. Puntoni M, Branchi D, Argusti A, Zanardi S, Crosta C, Meroni E, et al. A Randomized, Placebo-Controlled, Preoperative Trial of Allopurinol in Subjects with Colorectal Adenoma. *Cancer Prev Res* 2013;6:74-81.
61. Rassi A, Luquetti AO, Rassi Jr A, Rassi GG, Rassi SG, Da Silva IG, et al. Specific treatment for *Trypanosoma cruzi*: Lack of efficacy of allopurinol in the human chronic phase of chagas disease. *Am J Trop Med Hyg* 2007;76:58-61.
62. Rekhraj S, Gandy SJ, Szejkowski BR, Nadir MA, Noman A, Houston JG, et al. High-Dose Allopurinol Reduces Left Ventricular Mass in Patients With Ischemic Heart Disease. *J Am Coll Cardiol* 2013;61:926-32.

63. Rentoukas E, Tsarouhas K, Tsitsimpikou C, Lazaros G, Deftereos S, Vavetsi S. The prognostic impact of allopurinol in patients with acute myocardial infarction undergoing primary percutaneous coronary intervention. *Int J Cardiol* 2010;145:257-8.
64. Robertson AJ, Struthers AD. A Randomized Controlled Trial of Allopurinol in Patients With Peripheral Arterial Disease. *Can J Cardiol* 2015;32:190-6.
65. Rosenfeld JB. Effect of long-term allopurinol administration on serial GFR in normotensive and hypertensive hyperuricemic subjects. *Adv Exp Med Biol* 1974;41:581-96.
66. Saag KG, Whelton A, Becker MA, MacDonald P, Hunt B, Gunawardhana L. Impact of Febuxostat on Renal Function in Gout Patients With Moderate-to-Severe Renal Impairment. *Arthritis Rheumatol* 2016;68:2035-43.
67. Sarris E, Bagiatudi G, Stavrianaki D, Salpigidis K, M. S. Use of allopurinol in slowing the progression of chronic renal disease (abstract). *Nephrol Dial Transplant* 2007;47:vi61.
68. Schumacher HR, Jr., Becker MA, Wortmann RL, MacDonald PA, Hunt B, Streit J, et al. Effects of Febuxostat Versus Allopurinol and Placebo in Reducing Serum Urate in Subjects With Hyperuricemia and Gout: A 28-Week, Phase III, Randomized, Double-Blind, Parallel-Group Trial. *Arthritis Care Res* 2008;59:1540-8.
69. Segal MS, Srinivas TR, Mohandas R, Shuster JJ, Wen X, Whidden E, et al. The effect of the addition of allopurinol on blood pressure control in African Americans treated with a thiazide-like diuretic. *J Am Soc Hypertens*; 2015:610-9.

70. Separham A, Ghaffari S, Najafi H, Ghaffari R, Ziaee M, Babaei H. The Impact of Allopurinol on Patients With Acute ST Elevation Myocardial Infarction Undergoing Thrombolytic Therapy. *J Cardiovasc Pharmacol* 2016;68:265-8.
71. Shen H, Liu D. Clinical research on allopurinol in lowering serum uric acid level for the delay of the progression of chronic renal disease. *China Foreign Medical Treatment* 2010;12:88-9.
72. Shi Y, Chen W, Jalal D, Li Z, Chen W, Mao H, et al. Clinical outcome of hyperuricemia in IgA nephropathy: a retrospective cohort study and randomized controlled trial. *Kidney Blood Press Res* 2012;35:153-60.
73. Sircar D, Chatterjee S, Waikhom R, Golay V, Raychaudhury A, Chatterjee S, et al. Efficacy of Febuxostat for Slowing the GFR Decline in Patients With CKD and Asymptomatic Hyperuricemia: A 6-Month, Double-Blind, Randomized, Placebo-Controlled Trial. *Am J Kidney Dis* 2015;66:945-50.
74. Siu YP, Leung KT, Tong MK, Kwan TH. Use of allopurinol in slowing the progression of renal disease through its ability to lower serum uric acid level. *Am J Kidney Dis* 2006;47:51-9.
75. Szejkowski BR, Gandy SJ, Rekhraj S, Houston JG, Lang CC, Morris AD, et al. Allopurinol Reduces Left Ventricular Mass in Patients With Type 2 Diabetes and Left Ventricular Hypertrophy. *J Am Coll Cardiol* 2013;62:2284-93.

76. Taheraghdam AA, Sharifipour E, Pashapour A, Namdar S, Hatami A, Houshmandzad S, et al. Allopurinol as a Preventive Contrivance after Acute Ischemic Stroke in Patients with a High Level of Serum Uric Acid: A Randomized, Controlled Trial. *Med Princ Pract* 2014;23:134-9.
77. Takir M, Kostek O, Ozkok A, Elcioglu OC, Bakan A, Erek A, et al. Lowering Uric Acid With Allopurinol Improves Insulin Resistance and Systemic Inflammation in Asymptomatic Hyperuricemia. *J Investig Med* 2015;63:924-9.
78. Tan Y, Weinan D. Effect of Allopurinol in Chronic Kidney Disease Progression and Cardiovascular Risk. *Journal of Liaoning Medical University* 2014;35:17-9.
79. Tanaka K, Nakayama M, Kanno M, Kimura H, Watanabe K, Tani Y, et al. Renoprotective effects of febuxostat in hyperuricemic patients with chronic kidney disease: a parallel-group, randomized, controlled trial. *Clin Exp Nephrol* 2015;19:1044-53.
80. Tani S, Nagao K, Hirayama A. Effect of Febuxostat, a Xanthine Oxidase Inhibitor, on Cardiovascular Risk in Hyperuricemic Patients with Hypertension: A Prospective, Open-label, Pilot Study. *Clin Drug Investig* 2015;35:823.
81. Togha M, Akhondzadeh S, Motamedi M, Ahmadi B, Razeghi S. Allopurinol as adjunctive therapy in intractable epilepsy: a double-blind and placebo-controlled trial. *Arch Med Res* 2007;38:313-6.
82. Tsuruta Y, Kikuchi K, Tsuruta Y, Sasaki Y, Moriyama T, Itabashi M, et al. Febuxostat improves endothelial function in hemodialysis patients with hyperuricemia: A randomized controlled study. *Hemodial Int* 2015;19:514-20.



83. Usharani P, Nutalapati C, Pokuri VK, Kumar CU, Taduri G. A randomized, double-blind, placebo-, and positive-controlled clinical pilot study to evaluate the efficacy and tolerability of standardized aqueous extracts of Terminalia chebula and Terminalia bellerica in subjects with hyperuricemia. *Clin Pharmacol* 2016;8:51-9.
84. Wang X, Gao Y, An Y. Short-time impact of allopurinol on arterial elasticity in patients with hyperuricemia. . *Journal of Shandong University (Health Sciences)* 2012;50:1–5.
85. Wang X, Pang Z. Impact of Allopurinol on Atherosclerosis Complicated with Hyperuricemia. *Practical Journal of Cardiac Cerebral Pneuamal and Vascular Disease* 2015;23:20-3.
86. Weiser M, Gershon AA, Rubinstein K, Petcu C, Ladea M, Sima D, et al. A randomized controlled trial of allopurinol vs. placebo added on to antipsychotics in patients with schizophrenia or schizoaffective disorder. *Schizophr Res* 2012;138:35-8.
87. Weiser M, Burshtein S, Gershon AA, Marian G, Vlad N, Grecu IG, et al. Allopurinol for mania: a randomized trial of allopurinol versus placebo as add-on treatment to mood stabilizers and/or antipsychotic agents in manic patients with bipolar disorder. *Int J Bipolar Disorder* 2014;16:441-7.
88. Yin G, Han N, Li Y. Effect of allopurinol on unstable angina pectoris complicated with hyperuicemia. *Journal of Practical Diagnosis and Therapy* 2015;29:93-5.

89. Zhang J. The effect of intervene allopurinol of hyperuricemia and hyperlipidemia of patient with acute coronary syndrome prognosis. Chinese Journal of Clinical Rational Drug Use 2012;5:5-6.
90. Zhou DY, Zhao YJ, Xiao X. Treatment of hyperuricemia in chronic kidney disease patients and its effect. . Mod Med J China 2009;11:36-9.
91. Ziaee AM, Akhavizadegan H, Karbakhsh M. Effect of allopurinol in chronic nonbacterial prostatitis: a double blind randomized clinical trial. Int Braz J Urol 2006;32:181-6.
