# Supplementary material for: Xanthine oxidase inhibitors for prevention of cardiovascular events: a systematic review and meta-analysis of randomized controlled trials
Source: PubMed Central journal article supplement (PMC5804046; doi:10.1186/s12872-018-0757-9), 2018-02-07
Supplement: 12872_2018_757_MOESM3_ESM.pdf [file 12872_2018_757_MOESM3_ESM.pdf]

## **Additional File 3**

Bredemeier et al. Xanthine Oxidase Inhibitors for Prevention of Cardiovascular Events: A Systematic Review and Meta-Analysis of Randomized Controlled Trials. BMC Cardiovascular Disorders.

### **DESCRIPTION OF STUDIES EXCLUDED FROM THE META-ANALYSIS AFTER EVALUATION IN FULL-TEXT FORMAT**

#### **1) Initial systematic literature search from inception to Sep 29, 2014 (subtitles represent the reasons for exclusion).**

##### **Absence of placebo or no-treatment group**

1. Becker MA, Schumacher HR, MacDonald PA, Lloyd EJ, Lademacher C, Joseph-Ridge N. Urate-lowering therapy in subjects with gout: Interim results from the febuxostat/allopurinol comparative extension long-term study (EXCEL). *Annals of the Rheumatic Diseases* 2007;66:230-1.
2. Bosmansky K, Trnavsky K. Evaluation of the therapy effects of Acidum tienilicum, Benzbromaron and Allopurinol in gout patients. *Zeitschrift fur Rheumatologie*; 1982:165.
3. Calvo C, Lopez Paz JE, Hermida Ameijeiras A, Pena Seijo M, Calvo Gonzalez G, Romero Miguez ML. Hyperuricemia, cronoherapy with alopurinol and hypertension [abstract]. *Journal of hypertension*; 2010:e541.
4. Chocair P, Duley J, Simmonds HA, Cameron JS, Ianhez L, Arap S, et al. Low-dose allopurinol plus azathioprine/cyclosporin/prednisolone, a novel immunosuppressive regimen. *Lancet*; 1993:83-4.
5. Chocair PR, Duley JA, Cameron JS, Arap S, Ianhez L, Sabbaga E, et al. Does low-dose allopurinol, with azathioprine, cyclosporin and prednisolone, improve renal transplant immunosuppression? *Advances in Experimental Medicine and Biology* 1995;370:205-8.
6. Das VN, Ranjan A, Sinha AN, Verma N, Lal CS, Gupta AK, et al. A randomized clinical trial of low dosage combination of pentamidine and allopurinol in the treatment of antimony unresponsive cases of visceral leishmaniasis. *J Assoc Physicians India* 2001;49:609-13.

7. Kumar B, Agarwal PK. Comparative evaluation of efficacy and safety profile of febuxostat with allopurinol in patients with hyperuricemia and gout. *International Journal of Pharma Medicine and Biological Sciences*; 2013:52-6.
8. Kuzell WC, Seebach LM, Glover RP, Jackman AE. Treatment of gout with allopurinol and sulphinyprazone in combination and with allopurinol alone. *Ann Rheum Dis* 1966;25(6 Suppl):634-42.
9. Landmesser U, Spiekermann S, Preuss C, Sorrentino S, Fischer D, Manes C, et al. Angiotensin II induces endothelial xanthine oxidase activation: Role for endothelial dysfunction in patients with coronary disease. *Arteriosclerosis, Thrombosis, and Vascular Biology* 2007;27(4):943-8.
10. Liu C, Zhao Q, Zhen Y, Gao Y, Tian L, Wang L, et al. Prednisone in Uric Acid lowering in Symptomatic Heart Failure Patients With Hyperuricemia (PUSH-PATH) study. *The Canadian journal of cardiology*; 2013:1048-54.
11. MacDonald TM, Ford I, Nuki G, Mackenzie IS, De Caterina R, Findlay E, et al. Protocol of the Febuxostat versus Allopurinol Streamlined Trial (FAST): a large prospective, randomised, open, blinded endpoint study comparing the cardiovascular safety of allopurinol and febuxostat in the management of symptomatic hyperuricaemia. *Bmj Open* 2014;4(7).
12. Marwaha V, Singh B, Dawra S, Behl R, Singh H, Narayanan CS, et al. A clinical study of patients of chronic tophaceous gout with special reference to response to therapy. *Indian Journal of Rheumatology* 2010;5(3 SUPPL. 1):S29.
13. Matzkies F. [Long lasting normalization of uric acid after combination therapy with 300 mg allopurinol and 60 mg benzbromarone in patients with gout and hyperuricemia]. *Med Klin (Munich)* 1992;87(9):460-2.
14. Merimsky O, Inbar M, Chaitchik S. Treatment of advanced colorectal cancer by 5-fluorouracil-leucovorin combination with or without allopurinol: a prospective randomized study. *Anti-cancer drugs*; 1991:447-51.
15. Mitha E, Schumacher HR, Fouche L, Luo S-F, Weinstein SP, Yancopoulos GD, et al. Riloncept for gout flare prevention during initiation of uric acid-lowering therapy: results from the PRESURGE-2 international, phase 3, randomized, placebo-controlled trial. *Rheumatology* 2013;52(7):1285-92.
16. Nasr G, Maurice C. Allopurinol and global left myocardial function in heart failure patients. *J Cardiovasc Dis Res* 2010;1(4):191-5.

17. Nyfos L. [Treatment of the gouty diathesis with a xanthine oxidase inhibitor. A clinical trial of allopurinol]. *Ugeskr Laeger* 1967;129(8):253-7.
18. O'Driscoll JG, Green DJ, Rankin JM, Taylor RR. Nitric oxide-dependent endothelial function is unaffected by allopurinol in hypercholesterolaemic subjects. *Clinical and Experimental Pharmacology and Physiology* 1999;26(10):779-83.
19. Okada Y, Nonomura M, Takeuchi H, Kawamura J, Yoshida O. [Experimental and clinical studies on calcium lithiasis. II. Prevention of recurrent calcium stones with thiazides and allopurinol]. *Hinyokika Kiyo* 1986;32(9):1247-57.
20. Perez-Ruiz F, Calabozo M, Fernandez-Lopez MJ, Herrero-Beites A, Ruiz-Lucea E, Garcia-Erauskin G, et al. Treatment of chronic gout in patients with renal function impairment: An open, randomized, actively controlled study. *Journal of Clinical Rheumatology* 1999;5(2):49-55.
21. Pergament E, Christiansen N, DeBerry M. Inefficacy of allopurinol in treatment of Duchenne muscular dystrophy. *Current therapeutic research, clinical and experimental*; 1983:832-8.
22. Salim AS. Oxygen-derived free radical scavengers protect patients against the complications of erosive gastritis. *Intensive care medicine*; 1992:61-2.
23. Schumacher HR, Becker MA, Lloyd E, MacDonald PA, Lademacher C. Febuxostat in the treatment of gout: 5-yr findings of the FOCUS efficacy and safety study. *Rheumatology (Oxford, England)*; 2009:188-94.
24. Sies CW, Florkowski CM, Frampton CM, O'Donnell JL, Chapman PT, Stamp LK. Comparison of two plasma urate assays in patients receiving vitamin C supplementation. *Pathology* 2014;46(4):333-5.
25. Singal KK, Goyal S, Gupta P, Aggawal BK, Author A, Dept. of Medicine MMI, et al. Comparison between Allopurinol and Febuxostat in management of gout patients - A prospective study. *Bangladesh Journal of Medical Science* 2011;10(4):257-9.
26. Smyth CJ. Studies with allopurinol (HPP) in patients with tophaceous gout. *Arthritis Rheum* 1965;8(5):907-10.
27. Stamp LK, O'Donnell JL, Frampton C, Drake JM, Zhang M, Chapman PT. Clinically Insignificant Effect of Supplemental Vitamin C on Serum Urate in Patients With Gout: A Pilot Randomized Controlled Trial. *Arthritis and Rheumatism* 2013;65(6):1636-42.
28. Sziegoleit W, Mann D, Forster W, Crodel HW, Graupner S, Gutschker A, et al. MULTICENTRIC THERAPY STUDY WITH ALLOPURINOL AND TALINOLOL IN COMPARISON TO

PLACEBO IN PATIENTS WITH ANGINA-PECTORIS. Deutsche Gesundheitswesen-Zeitschrift Fur Klinische Medizin 1981;36(7):321-5.

29. Tobaigy M, Mejer J, Peitersen B, Ansari M, Poll P. A comparative study of allopurinol and pentostam in the treatment of visceral leishmaniasis. *Advances in experimental medicine and biology*; 1986:471-3.
30. Torres RJ, Prior C, Puig JG, Author A, Division of C, Biochemistry LPUHMS, et al. Efficacy and safety of allopurinol in patients with hypoxanthine-guanine phosphoribosyltransferase deficiency. *Metabolism: Clinical and Experimental* 2007;56(9):1179-86.
31. Tousoulis D, Andreou I, Tsiatas M, Miliou A, Tentolouris C, Siasos G, et al. Effects of rosuvastatin and allopurinol on circulating endothelial progenitor cells in patients with congestive heart failure: the impact of inflammatory process and oxidative stress. *Atherosclerosis* 2011;214(1):151-7.
32. Viglioglia PA, Plante GE, Viglioglia J, Saraceno EF. Allopurinol in psoriasis. *Dermatologica* 1970;141(3):203-7.
33. Wang YF, Li BH, Zhang M, Xu WB, Zhou R, Zhou M, et al. Stage-based treatment of gouty arthritis by combination therapy of traditional Chinese and Western medicines: A randomized controlled trial. *Journal of Chinese Integrative Medicine* 2008;6(6):576-80.
34. Xie JY, Wang L, Li QX, Li XM. [Study on mechanisms of electroacupuncture treatment of acute gouty arthritis]. *Zhongguo Zhen Jiu* 2007;27(12):898-900.
35. Yamamoto T, Moriwaki Y, Takahashi S, Tsutsumi Z, Yamakita J, Higashino K. Effect of allopurinol and benzbromarone on the concentration of uridine in plasma. *Metabolism* 1997;46(12):1473-6.
36. Yokomizo H, Yoshimatsu K, Hashimoto M, Ishibashi K, Umehara A, Yoshida K, et al. Prophylactic Efficacy of Allopurinol Ice Ball for Leucovorin/ 5-Fluorouracil Therapy-induced Stomatitis. *Anticancer Research* 2004;24(2 C):1131-4.
37. Zulantay I, Apt W, Rodriguez J, Venegas J, Sanchez G. Serologic evaluation of treatment of chronic Chagas disease with allopurinol and itraconazole. *Revista Medica De Chile* 1998;126(3):265-70.

## Study protocol

1. Freudenberg RS, Schwarz Jr RP, Brown J, Moore A, Mann D, Givertz MM, et al. Rationale, design and organisation of an efficacy and safety study of oxypurinol added to standard therapy in patients with NYHA class III - IV congestive heart failure. *Expert Opinion on Investigational Drugs* 2004;13(11):1509-16.
2. Hosoya T, Kimura K, Itoh S, Inaba M, Uchida S, Tomino Y, et al. The effect of febuxostat to prevent a further reduction in renal function of patients with hyperuricemia who have never had gout and are complicated by chronic kidney disease stage 3: study protocol for a multicenter randomized controlled study. *Trials* 2014;15.

## Publication not obtained

1. Bailey RR, Author A, Christchurch Hosp C, Correspondence A, Christchurch Hosp C. Allopurinol in calcium stone disease. *Current Therapeutics* 1978;19(6):13-5.
2. Emmerson BT. The use of the xanthine oxidase inhibitor, allopurinol, in the control of hyperuricaemia, gout and uric acid calculi. *Australas Ann Med* 1967;16(3):205-14.
3. Eyman E, Brzozowska-Jurkowska A, Werynska-Przybylska J. [Clinical evaluation of Milurit]. *Reumatologia* 1973;11(3):299-304.
4. Kalyakin IE, Mitkin AF. Effects of allopurinol on uric acid metabolism and lipid peroxidation in IHD patients with stable angina pectoris. *Kardiologiya*; 1993:15-7.

## Inclusion of individuals <18 years-old

1. Allopurinol reduces blood pressure in hypertensive youths AUTHOR ADDRESSES SOURCE *Australian Journal of Pharmacy* (2009) 90:1067 (76-77). Date of Publication: April 2009.
2. Apt W, Aguilera X, Arribada A, Perez C, Miranda C, Zulantay I, et al. TREATMENT OF CHRONIC HUMAN CHAGAS-DISEASE WITH ITRACONAZOLE AND ALLOPURINOL - PRELIMINARY-REPORT. *Revista Medica De Chile* 1994;122(4):420-7.

3. El-Samahy MH, Elbarbary NS, Afify MAA, Sallam DE, Author A, Ain S, et al. Effect of allopurinol versus angiotensin converting enzyme inhibitors in decreasing microalbuminuria in type I diabetic patients. *Pediatric Diabetes* 2014;15 SUPPL. 19:84.
4. Ginella A, Holzman A, Iihoshi N, Barja Z, Peredo C. Eficacia del Alopurinol en la Enfermedad de Chagas Cronica. Resultados del estudio realizado en Santa Cruz, Bolivia. Efficacy of the Allopurinol in chronic Chagas disease. *Bol. cient. CENETROP*;16(1):25-9.
5. Griffiths RD, Cady E, Edwards RHT, Wilkie DR. 31 PHOSPHORUS NUCLEAR MAGNETIC-RESONANCE USED IN A DOUBLE-BLIND TRIAL OF ALLOPURINOL IN DUCHENNE MUSCULAR-DYSTROPHY. *Clinical Science* 1984;66(2):P20-P.
6. Horsfall PA, Plummer J, Allan WG, Girling DJ, Nunn AJ, Fox W. Double blind controlled comparison of aspirin, allopurinol and placebo in the management of arthralgia during pyrazinamide administration. *Tubercle*; 1979:13-24.
7. Martinez S, Marr JJ. Allopurinol in the treatment of American cutaneous leishmaniasis. *New England journal of medicine*; 1992:741-4.
8. Miranda ME. The influence of allopurinol on renal deterioration in familial nephropathy associated with hyperuricemia (FNAH). The Spanish Group for the Study of FNAH. *Adv Exp Med Biol* 1994;370:61-4.
9. Nct. Randomized Double-blinded, Placebo-controlled, Cross-over Trial of Allopurinol for the Treatment of Newly Diagnosed Essential Hypertension in Adolescents. *ClinicalTrials.gov* [<http://clinicaltrials.gov>]; 2003.
10. Smith CR. Possible cardioprotective effects of allopurinol. *Am J Prev Med* 1988;4(2 Suppl):33-8.
11. Sonoda T, Koide T, Oka T, Sakaguchi H, Itatani H, Ohkawa T, et al. [A study of allopurinol in the prevention of recurrent calcium oxalate stones]. *Hinyokika Kyo* 1985;31(11):2071-9.

### **Different publications of studies already evaluated**

1. Akhondzadeh S, Milajerdi MR, Amini H, Moinalghorabaei M. A double-blind, randomized, placebo-controlled study of allopurinol as adjunctive treatment for acute mania in hospitalized bipolar patients. *British Journal of Clinical Pharmacology* 2005;59(5):634-.

2. Akhondzadeh S, Safarcherati A, Amini H. Beneficial antipsychotic effects of allopurinol as add-on therapy for schizophrenia: a double blind, randomized and placebo controlled trial. *Progress in Neuro-Psychopharmacology & Biological Psychiatry* 2005;29(2):253-9.
3. Becker MA, Schumacher H, Wortmann RL, Joseph-Ridge N, Lademacher C. A safety and efficacy clinical trial of a novel non-purine selective inhibitor of xanthine oxidase, febuxostat in subjects with gout. *Annals of the Rheumatic Diseases* 2004;63:60-.
4. Brunstein MG, Ghisolfi ES, Ramos FLP, Lara DR. Clinical trial of allopurinol adjuvant therapy for poorly responsive schizophrenia. *Schizophrenia Research* 2004;67(1):142-3.
5. Dawson J, Quinn TJ, Harrow C, Lees KR, Walters MR. The effect of allopurinol on the cerebral vasculature of patients with subcortical stroke; a randomized trial. *British Journal of Clinical Pharmacology* 2009;68(5):662-8.
6. Farquharson CAJ, Butler R, Hill A, Belch JJF, Struthers AD. Endothelial vasodilator dysfunction in chronic heart failure patients is improved by allopurinol [abstract]. *Clinical science*; 1999:2p-3p.
7. Gibson T, Simmonds HA, Potter C, Rogers V. A controlled study of the effect of long term allopurinol treatment on renal function in gout. *Adv Exp Med Biol* 1980;122a:257-62.
8. Goldfarb DS, MacDonald P, Hunt B, Gunawardhana L, Author A, New York Vamc NYULMCNYUS, et al. Febuxostat in gout: Serum urate responses in uric acid overproducers vs. underexcretors. *American Journal of Kidney Diseases* 2010;55(4):A59.
9. Goldfarb DS, MacDonald PA, Gunawardhana L, Chefo S, McLean L, Author A, et al. Prevention of recurrent calcium stones in subjects with hyperuricosuria: A randomized controlled trial of febuxostat vs allopurinol. *Arthritis and Rheumatism* 2012;64 SUPPL. 10:S67.
10. Harrow CJ, Muir SW, Lees KR, Walters MR. Allopurinol's effect on intercellular adhesion molecule 1 (ICAM) and inflammatory cytokines after ischaemic stroke: a pilot study. *Cerebrovascular diseases (Basel, Switzerland)*; 2006:131-2.
11. Higgins P, Walters MR, Lees KR, McConnachie A, Murray H, McArthur K. Allopurinol reduces carotid artery intima-media thickness progression amongst stroke survivors. *Cerebrovascular diseases (Basel, Switzerland)*; 2013:578.
12. Joseph-Ridge N. Phase II, dose-response, safety and efficacy clinical trial of a new oral xanthine oxidase inhibitor TMX-67 (febuxostat) in subjects with gout. *Arthritis and Rheumatism* 2002;46(9):S142-S.

13. Kao MP, Ang DS, Gandy SJ, Lang CC, Struthers AD, Author A, et al. Allopurinol reduces both left ventricular hypertrophy and endothelial dysfunction in patients with chronic kidney disease. *NDT Plus* 2010;3 SUPPL. 3:iii302.
14. Kao MP, Ang DS, Gandy SJ, Nadir A, Lang CC, Struthers AD, et al. Allopurinol reduces both left ventricular hypertrophy and endothelial dysfunction in cardiorenal patients. *European Heart Journal* 2010;31 SUPPL. 1:164.

### **Intervention and control groups differ not only on use of XO1**

1. Guderian RH, Chico ME, Rogers MD, Pattishall KM, Grogl M, Berman JD. PLACEBO CONTROLLED TREATMENT OF ECUADORIAN CUTANEOUS LEISHMANIASIS. *American Journal of Tropical Medicine and Hygiene* 1991;45(1):92-7.
2. Herrick AL, Hollis S, Schofield D, Rieley F, Blann A, Griffin K, et al. A double-blind placebo-controlled trial of antioxidant therapy in limited cutaneous systemic sclerosis. *Clin Exp Rheumatol* 2000;18(3):349-56.

### **Results could not be translated**

1. Momeni A, Shahidi S, Seirafian S, Taheri S, Kheiri S. Effect of Allopurinol in Decreasing Proteinuria in Type 2 Diabetic Patients. *Iranian Journal of Kidney Diseases* 2010;4(2):128-32.

### **Follow-up or treatment duration <28 days**

1. Avidan MS, Meehan N, Sherwood RA, Pj. Allopurinol for the prevention of reperfusion injury during open heart surgery [abstract]. *British journal of anaesthesia*; 1999:176p.
2. Davis PS, Deller DJ. Effect of a xanthine-oxidase inhibitor (allopurinol) on radioiron absorption in man. *Lancet*; 1966:470-2.
3. DeConti RC, Calabresi P. Use of allopurinol for prevention and control of hyperuricemia in patients with neoplastic disease. *N Engl J Med* 1966;274(9):481-6.



4. Johnson WD, Kayser KL, Brenowitz JB, Saedi SF. A RANDOMIZED CONTROLLED TRIAL OF ALLOPURINOL IN CORONARY-BYPASS SURGERY. *American Heart Journal* 1991;121(1):20-4.
5. Nazari A, Sadrolhefazi B, Nikoofar A, Erfan M, Azizian H, Alamy M. Allopurinol mouthwash for prevention or alleviation radiotherapy induced oral mucositis: a randomized, placebo-controlled trial. *Daru-Journal of Faculty of Pharmacy* 2007;15(4):227-30.
6. Nct. Phase 2 Study to Determine if Allopurinol Blocks Features of Metabolic Syndrome Induced by Fructose Ingestion. *ClinicalTrials.gov* [<http://clinicaltrials.gov>]; 2008.
7. Nicotero JA, Scheib ET, Martinez R, Rodnan GP, Shapiro AP. Prevention of hyperuricemia by allopurinol in hypertensive patients treated with chlorothiazide. *N Engl J Med* 1970;282(3):133-5.
8. Parmley LF, Mufti AG, Downey JM. ALLOPURINOL THERAPY OF ISCHEMIC-HEART-DISEASE WITH INFARCT EXTENSION. *Canadian Journal of Cardiology* 1992;8(3):280-6.
9. Scott JT. Comparison of allopurinol and probenecid. *Annals of the rheumatic diseases*; 1966:623-6.
10. Subramanian S, Abraham OC, Usha S. Allopurinol as an adjust to quinine in the treatment of uncomplicated falciparum malaria [abstract no:83]. *Journal of the Association of Physicians of India*; 2001.
11. Tsavaris N, Bacoyannis C, Milonakis N, Sarafidou M, Zamanis N, Magoulas D, et al. Folinic acid plus high-dose 5-fluorouracil with allopurinol protection in the treatment of advanced colorectal carcinoma. *Eur J Cancer* 1990;26(10):1054-6.
12. Vriens MR, Marinelli A, Harinck HIJ, Zwinderman KH, Van de Velde CJH, Author A, et al. The role of allopurinol in human liver ischemia/reperfusion injury: A prospective randomized clinical trial. *Hepato-Gastroenterology* 2002;49(46):1069-73.
13. Wortmann RL, MacDonald PA, Hunt B, Jackson RL. Effect of Prophylaxis on Gout Flares After the Initiation of Urate-Lowering Therapy: Analysis of Data From Three Phase III Trials. *Clinical Therapeutics* 2010;32(14):2386-97.
14. Ziaee AM, Akhavizadegan H, Karbakhsh M. Effect of allopurinol in chronic nonbacterial prostatitis: a double blind randomized clinical trial. *Int Braz J Urol*;32(2):181-6.

## Abstracts or full-text articles with no extractable data

1. Andreou I, Tousoulis D, Papadimitriou CA, Tentolouris C, Tsiatas M, Siasos G, et al. Effects of rosuvastatin and allopurinol treatment on endothelial progenitor cells in patients with chronic heart failure. *European Heart Journal* 2010;31 SUPPL. 1:853.
2. Apt W, Aguilera X, Arribada A, Perez C, Miranda C, Sanchez G, et al. Treatment of chronic Chagas' disease with itraconazole and allopurinol. *American Journal of Tropical Medicine and Hygiene* 1998;59(1):133-8.
3. Bergamini C, Cicoira M, Rossi A, Cassater D, Zanolla L, Vassanelli C, et al. Allopurinol lowers NT-proBNP plasma levels and improves diastolic function in heart failure patients: A double-blind, placebo-controlled study. *European Heart Journal* 2010;31 SUPPL. 1:849.
4. Berthoux FC, Juge J, Genin C, Sabatier JC, Assenat H. DOUBLE-BLIND TRIAL OF ALLOPURINOL AS A PREVENTIVE TREATMENT IN CALCIUM UROLITHIASIS. *Mineral and Electrolyte Metabolism* 1979;2(4-5):207-.
5. Burshtein S, Weiser M, Gershon AA, Marian G, Vlad N, Grecu IG, et al. Allopurinol for mania. A randomized trial of allopurinol versus placebo as add-on treatment in manic bipolar patients. *European Neuropsychopharmacology* 2013;23 SUPPL. 2:S378.
6. Butler R, Morris AD, Belch JJ, Hill A, Struthers AD. Allopurinol normalizes endothelial dysfunction in type 2 diabetics with mild hypertension. *Hypertension* 2000;35(3):746-51.
7. Farquharson CA, Butler R, Hill A, Belch JJ, Struthers AD. Allopurinol improves endothelial dysfunction in chronic heart failure. *Circulation* 2002;106(2):221-6.
8. Green D, O'Driscoll G, Rankin J, Taylor R. Endothelium-derived nitric oxide activity in forearm vessels of hypercholesterolaemic patients is unaffected by allopurinol. [abstract]. *Australian and New Zealand journal of medicine*; 1998:105.
9. Ivanov DD, Ivanova MD, Author A, Nephrology, Rrt Dept NMAo, Postgraduate Education named P.Shupik KU, et al. Febuxostat improves GFR and BP in non-diabetic adults with CKD 2-3. *Nephrology Dialysis Transplantation* 2013;28 SUPPL. 1:i48.
10. Kamatani N, Fujimori S, Hada T, Hosoya T, Kato R, Matsuzawa Y, et al. Phase II dose-response clinical trial using febuxostat (TMX-67), a novel-type xanthine Oxidase/Xanthine dehydrogenase inhibitor, for gout and hyperuricemia. *Arthritis and Rheumatism* 2003;48(9):S530-S.

11. Kamatani N, Fujimori S, Hada T, Hosoya T, Matsuzawa Y, Ueda J, et al. Febuxostat, a novel non-purine selective inhibitor of xanthine oxidase, in a Phase III placebo-controlled double-blind clinical trial in Japanese subjects with gout or hyperuricemia. *Arthritis and Rheumatism* 2004;50(9):S337-S.
12. Mendell JR, Wiechers DO. Lack of benefit of allopurinol in Duchenne dystrophy. *Muscle Nerve* 1979;2(1):53-6.
13. Miano L, Petta S, Paradisogalatioto G, Goldoni S. PLACEBO-CONTROLLED DOUBLE-BLIND-STUDY OF ALLOPURINOL IN SEVERE RECURRENT IDIOPATHIC RENAL LITHIASIS - PRELIMINARY-RESULTS. *Urological Research* 1984;12(1):46-.
14. Neu I, Mueller J, Authenrieth W, Hahn F. Treatment of hyperuricemia with special reference to tolerability. Double-blind crossover study of micronized benzbromaron vs. allopurinol. <ORIGINAL> THERAPIE DER HYPERURIKAMIE UNTER BESONDERER BERUICKSICHTIGUNG DER VERTRAGLICHKEIT. *Die Therapiewoche*; 1981:3168-75.
15. Persson BE, Ronquist G. Abacterial prostatitis and uric acid in prostatic expressate, and objective and subjective effect of allopurinol treatment: A double-blind, placebo-controlled study. *Scandinavian journal of urology and nephrology. Supplementum*; 1994:21-2.
16. Persson BE, Ronquist G, Author A, Department of Urology UH, Uppsala S, Correspondence A, et al. Abacterial prostatitis and uric acid in prostatic expressate, and objective and subjective effect of allopurinol treatment: A double-blind, placebo-controlled study. *Scandinavian Journal of Urology and Nephrology, Supplement* 1994(164):21-2.
17. Saag KG, Becker MA, Whelton A, MacDonald PA, Zhou Y, Gunawardhana L. Effect Of Febuxostat On Serum Urate Levels In Gout Subjects With Hyperuricemia and Moderate-To-Severe Renal Impairment: A Randomized Controlled Trial. *Arthritis and Rheumatism* 2013;65:S498-S9.
18. Saag KG, Becker MA, Whelton A, MacDonald PA, Zhou Y, Gunawardhana L, et al. Effect of febuxostat on serum urate levels in gout subjects with hyperuricemia and moderate-to-severe renal impairment: A randomized controlled trial. *Arthritis and Rheumatism* 2013;65 SUPPL. 10:S498-S9.
19. Sharifipour E, Taheraghdam A, Farhoudi M, Pashapour A, Sadeghi Hokmabadi E, Mostafaie S, et al. Effect of allopurinol in ischemic stroke prognosis. *Cerebrovascular Diseases* 2011;31 SUPPL. 2:129.
20. Smith MJ, Boyce WH. Allopurinol and urolithiasis. *J Urol* 1969;102(6):750-3.

21. Streiker FB. The use of allopurinol in controlling hyperuricemia. *J Am Podiatry Assoc* 1969;59(3):87-9.
22. Velez I, Agudelo S, Hendrickx E, Puerta J, Grogil M, Modabber F, et al. Inefficacy of allopurinol as monotherapy for Colombian cutaneous leishmaniasis: A randomized, controlled trial. *Annals of Internal Medicine* 1997;126(3):232-6.
23. Walter-Sack I, De Vries JX, Ernst B, Frei M, Kolb S, Kosmowski J, et al. Uric acid lowering effect of oxipurinol sodium in hyperuricemic patients: Therapeutic equivalence to allopurinol. *Journal of Rheumatology* 1996;23(3):498-501.
24. Wang XZ, Song YX, Song QF, Zhang LN, Jia HJ. Effect of allopurinol on the function of blood vessel endothelium in patients with essential hypertension complicating hyperuricemia. *Journal of china pharmacy*; 2005.
25. Williams R, Author A. Slowing the progression of renal disease with allopurinol. *Nature Clinical Practice Nephrology* 2006;2(4):180.
26. Yamanaka H, Nishioka K, Suzuki T, Kohno K. Allopurinol metabolism in a patient with xanthine oxidase deficiency. *Ann Rheum Dis* 1983;42(6):684-6.

### **Review, editorial, observational or quasi-experimental studies**

1. Allopurinol and the control of hyperuricemia in neoplastic disease. *Med Lett Drugs Ther* 1968;10(25):103-4.
2. Bayram D, Tugrul Sezer M, Inal S, Altuntas A, Kidir V, Orhan H. The effects of allopurinol on metabolic acidosis and endothelial functions in chronic kidney disease patients. *Clin Exp Nephrol* 2014.
3. Beutler AM, Rull M, Schlesinger N, Baker DG, Hoffman BI, Schumacher BI, Jr., et al. Treatment with allopurinol decreases the number of acute gout attacks despite persistently elevated serum uric acid levels [1]. *Clinical and Experimental Rheumatology* 2001;19(5):595.
4. Blanco Vicente E. Effect of high doses of allopurinol patients with chronic stable angina: randomized controlled placebo. *Revista Clinica Espanola* 2011;211(4):205-.
5. Brown CH, 3rd, Stashick E, Carbone PP. Clinical efficacy and lack of toxicity of allopurinol (NSC-1390) given intravenously. *Cancer Chemother Rep* 1970;54(2):125-9.

6. Castelli P, Munari M, Author A, Anestesia e Rianimazione MI, Correspondence A, P. Castelli AeRMI. Improvement of cardiac function by allopurinol [2]. *Journal of Cardiothoracic and Vascular Anesthesia* 1997;11(6):809-10.
7. Chalmers RA, Kromer H, Scott JT, Watts RWE. A COMPARATIVE STUDY OF XANTHINE OXIDASE INHIBITORS ALLOPURINOL AND OXIPURINOL IN MAN. *Clinical Science* 1968;35(2):353-&.
8. Chohan S, Becker M, MacDonald P, Palmer R, Chefo S, Jackson R, et al. Efficacy and safety of febuxostat and allopurinol in women with gout, an older subset with increased comorbidity. *Journal of Rheumatology* 2011;38(6):1152.
9. DeConti RC, Calabresi P. Use of allopurinol for control of hyperuricemia in leukemia and lymphoma. *Conn Med* 1967;30(6):430-6.
10. Drew CD. The importance of renal damage due to hyperuricaemia and its prevention by allopurinol. *J Med Liban* 1970;23(2):161-72.
11. el-Gamel A, Evans C, Keevil B, Aziz T, Rahman A, Campbell C, et al. Effect of allopurinol on the metabolism of azathioprine in heart transplant patients. *Transplant Proc* 1998;30(4):1127-9.
12. Ettinger B, Citron J, Tang A. CONTROLLED-STUDIES IN STONE PROPHYLAXIS - COMPARISON OF PLACEBO VERSUS ALLOPURINOL CHLORTHALIDONE MAGNESIUM-HYDROXIDE. *Urological Research* 1984;12(1):49-.
13. Frang D, Berenyi M, Vegh A. [Allopurinol treatment of patients with uric acid calculi]. *Acta Chir Acad Sci Hung* 1973;14(2):105-11.
14. Gavin AD, Struthers AD. Allopurinol reduces B-type natriuretic peptide concentrations and haemoglobin but does not alter exercise capacity in chronic heart failure. *Heart* 2005;91(6):749-53.
15. Gunther R, Knapp E. [Effect of allopurinol (Zyloric) on uric acid, creatinine, fasting blood sugar and plasma lipids in patients with gout]. [German]. *Wiener klinische Wochenschrift*; 1970:78-82.
16. Jacobs F, Mamzer-Bruneel MF, Skhiri H, Thervet E, Legendre C, Kreis H. Safety of the mycophenolate mofetil-allopurinol combination in kidney transplant recipients with gout. *Transplantation* 1997;64(7):1087-8.
17. Lee M, Chen Y, Shen C, Author A, Institute of Biomedical Sciences A, Sinica TT, et al. A prospective study of HLA-B\*58:01 genotyping for the prevention of allopurinol

induced severe cutaneous adverse reactions. *Clinical Pharmacology and Therapeutics* 2012;91 SUPPL. 1:S107.

18. Marangella M, Tricerri A, Sonogo S, Ronzani M, Fruttero B, Daniele PG, et al. Critical evaluation of various forms of therapy for idiopathic calcium stone disease. *Proc Eur Dial Transplant Assoc* 1983;20:434-9.
19. McNaughton Collins M, Wilt T. Allopurinol for chronic prostatitis. *Cochrane Database Syst Rev* 2000(2):Cd001041.
20. Meltzer M, Author A, Thomas Jefferson University PPAUS, Correspondence A, M. Meltzer TJUPPAUS. Allopurinol versus riloncept for the prevention of gout flares: Comment on the Article by Schumacher et al. *Arthritis Care and Research* 2013;65(5):838.
21. Muszkowska-Penson J, Chodorowski Z. [Allopurinol in the treatment of gout]. *Pol Tyg Lek* 1969;24(8):286-8.
22. Nickel JC, Siemens DR, Lundie MJ. Ameliorative effect of allopurinol on nonbacterial prostatitis: A parallel double-blind controlled study. *Journal of Urology* 1997;157(2):628-.
23. Pai BH, Swarnalatha G, Ram R, Dakshinamurty KV. Allopurinol for prevention of progression of kidney disease with hyperuricemia. *Indian J Nephrol* 2013;23(4):280-6.
24. Perez-Ruiz F, Alonso-Ruiz A, Calabozo M, Herrero-Beites A, Garcia-Erauskin G, Ruiz-Lucea E, et al. Efficacy of allopurinol and benzbromarone for the control of hyperuricaemia. A pathogenic approach to the treatment of primary chronic gout. *Annals of the Rheumatic Diseases* 1998;57(9):545-9.
25. Pochedly C. Hyperuricemia in leukemia and lymphoma. *Postgrad Med* 1974;55(6):93-9.
26. Pohar S, Murphy G. Febuxostat for prevention of gout attacks. *Issues Emerg Health Technol* 2006(87):1-4.
27. Radak-Perovic M, Zlatkovic-Svenda M. The Efficacy and Tolerability of Allopurinol Dose Escalation in Patients with Gout. *Srpski Arhiv Za Celokupno Lekarstvo* 2013;141(5-6):333-6.
28. Reinders MK, Haagsma C, Jansen TL, Roon EN, Delsing J, Laar MA, et al. A randomised controlled trial on the efficacy and tolerability with dose escalation of allopurinol 300-600 mg/day versus benzbromarone 100-200 mg/day in patients with gout. *Annals of the rheumatic diseases*; 2009:892-7.

29. Salim AS. Oxygen-derived free-radical scavengers prolong survival in gastric cancer. *Chemotherapy*; 1992:135-44.
30. Salim AS. The relationship between *Helicobacter pylori* and oxygen-derived free radicals in the mechanism of duodenal ulceration. *Internal medicine (Tokyo, Japan)*; 1993:359-64.
31. Salim AS. Scavengers of oxygen-derived free radicals prolong survival in advanced colonic cancer. A new approach. *Tumour biology*; 1993:9-17.
32. Schumacher HR, Sundry JS, Terkeltaub R, Knapp HR, Mellis S, Soo Y, et al. Placebo-controlled study of riloncept for gout flare prophylaxis during initiation of urate-lowering therapy. *Arthritis and Rheumatism* 2009;60 SUPPL. 10:1096.
33. Scott R, Paterson PJ, Mathieson A, Smith M. The effect of allopurinol on urinary oxalate excretion in stone formers. *Br J Urol* 1978;50(7):455-8.
34. Shi Y, Chen W, Jalal D, Li Z, Chen W, Mao H, et al. Clinical Outcome of Hyperuricemia in IgA Nephropathy: A Retrospective Cohort Study and Randomized Controlled Trial. *Kidney & Blood Pressure Research* 2012;35(3):153-60.
35. Singh JA. Can racial disparities in optimal gout treatment be reduced? Evidence from a randomized trial. *Bmc Medicine* 2012;10.
36. Smith MJ. Allopurinol and calcium-stone formers. *Lancet*; 1973:315.
37. Smith MJ. Placebo versus allopurinol for renal calculi. *Journal of urology*; 1977:690-2.
38. Smith MJ. Placebo versus allopurinol for recurrent urinary calculi. *Proceedings of the European Dialysis and Transplant Association. European Dialysis and Transplant Association*; 1983:422-6.
39. Sramek F. [Use of allopurinol in the treatment of urolithiasis]. *Rozhl Chir* 1975;54(7):472-6.
40. Stamp L, O'Donnell JL, Zhang M, Frampton C, Barclay M, Chapman PT, et al. Increasing allopurinol dose above the recommended range is effective and safe in chronic gout, including in those with renal impairment a pilot study. *Arthritis and Rheumatism* 2009;60 SUPPL. 10:1950.
41. Stamp LK, O'Donnell JL, Zhang M, James J, Frampton C, Barclay ML, et al. Using allopurinol above the dose based on creatinine clearance is effective and safe in patients

with chronic gout, including those with renal impairment. *Arthritis Rheum* 2011;63(2):412-21.

42. Stolbach L, Begg C, Bennett JM, Silverstein M, Falkson G, Harris DT, et al. Evaluation of bone marrow toxic reaction in patients treated with allopurinol. *Jama* 1982;247(3):334-6.

43. Stone PH, Author A, Cardiovascular Division Ba, Women's Hospital HMSFSBMA, States U, Correspondence A, et al. Allopurinol: A new anti-ischemic role for an old drug. *Journal of the American College of Cardiology* 2011;58(8):829-30.

44. Szigoleit W, Böger W, Noack W, Förster W. Therapeutic trial with Allopurinol in peripheral arterial occlusion in comparison to Xanthinolnikotinat. *Das Deutsche Gesundheitswesen*; 1981:171-4.

45. Tausche AK, Christoph M, Forkmann M, Richter U, Kopprasch S, Bielitz C, et al. As compared to allopurinol, urate-lowering therapy with febuxostat has superior effects on oxidative stress and pulse wave velocity in patients with severe chronic tophaceous gout. *Rheumatology International* 2014;34(1):101-9.

46. Teramoto S, Kume H, Yamaguchi Y, Yamamoto H, Hanaoka Y, Ishii M, et al. Improvement of endothelial function with allopurinol may occur in selected patients with OSA: Effect of age and sex [3]. *European Respiratory Journal* 2007;29(1):216-7.

47. Terawaki H, Nakayama M, Miyazawa E, Murata Y, Nakayama K, Matsushima M, et al. Effect of allopurinol on cardiovascular incidence among hypertensive nephropathy patients: the Gonryo study. *Clinical and Experimental Nephrology* 2013;17(4):549-53.

48. Thomson WH, Smith I. X-linked recessive (Duchenne) muscular dystrophy (DMD) and purine metabolism: effects of oral allopurinol and adenylate. *Metabolism: clinical and experimental*; 1978:151-63.

49. Tiselius HG, Larsson L. Urine composition in patients with renal stone disease during treatment with allopurinol. *Scand J Urol Nephrol* 1980;14(1):65-71.

50. Toledopereyra LH, Simmons RL, Olson LC, Najarian JS. CLINICAL EFFECT OF ALLOPURINOL ON PRESERVED KIDNEYS - RANDOMIZED DOUBLE-BLIND-STUDY. *Annals of Surgery* 1977;185(1):128-31.

51. Tsuruta Y, Nitta K, Akizawa T, Fukuhara S, Saito A, Kurokawa K, et al. Allopurinol and all-cause mortality among hemodialysis (HD) patients (pts): Results from the dialysis outcomes and practice patterns study (DOPPS) in Japan. *NDT Plus* 2010;3 SUPPL. 3:iii92.



52. Tuta L, Stanigut A, Author A, Ovidius University of Constanta Fo, Medicine CR, Correspondence A, et al. Allopurinol therapy for hyperuricemia reduces inflammation and progression of renal disease in moderate chronic kidney disease. *Nephrology Dialysis Transplantation* 2014;29 SUPPL. 3:iii118.
53. von Haehling S, Bode-Boger SM, Martens-Lobenhoffer J, Rauchhaus M, Schefold JC, Genth-Zotz S, et al. Elevated levels of asymmetric dimethylarginine in chronic heart failure: a pathophysiologic link between oxygen radical load and impaired vasodilator capacity and the therapeutic effect of allopurinol. *Clin Pharmacol Ther* 2010;88(4):506-12.
54. Walters M. New therapeutic targets in stroke prevention: the effects of allopurinol on the cerebrovasculature of patients with subcortical stroke. *Current Controlled Trials* (<http://www.controlled-trials.com/>); 2005.
55. Walters M, Dawson J. Allo IMT study. The effect of allopurinol on carotid ultrasound intima-thickness and markers of endothelial function in patients with recent stroke. UK Clinical Research Network Portfolio Database (<http://public.ukcrn.org.uk/search/>); 2008.
56. Whelton A, MacDonald PA, Chefo S, Gunawardhana L. Preservation of Renal Function During Gout Treatment With Febuxostat: A Quantitative Study. *Postgraduate Medicine* 2013;125(1):106-14.
57. Whelton A, MacDonald PA, Zhao L, Hunt B, Gunawardhana L. Renal Function in Gout Long-Term Treatment Effects of Febuxostat. *Jcr-Journal of Clinical Rheumatology* 2011;17(1):7-13.
58. White WB, Chohan S, Dabholkar A, Hunt B, Jackson R. Cardiovascular Safety of Febuxostat and Allopurinol in Patients With Gout and Cardiovascular Comorbidity. *American Heart Journal* 2012;164(1):14-20.
59. Wortmann RL, Becker MA, Schumacher HR, Jr., MacDonald PA, Hunt BJ, Joseph-Ridge N. Effect of febuxostat or allopurinol on the clinical manifestations of gout: Reduction in gout flares and tophus size over time in the EXCEL trial. *Arthritis and Rheumatism* 2006;54(9):S642-S.
60. Wright DF, Stamp LK, Merriman TR, Barclay ML, Duffull SB, Holford NH. The population pharmacokinetics of allopurinol and oxypurinol in patients with gout. *Eur J Clin Pharmacol* 2013;69(7):1411-21.
61. Wu AH, Ghali JK, Neuberg GW, O'Connor CM, Carson PE, Levy WC. Uric acid level and allopurinol use as risk markers of mortality and morbidity in systolic heart failure. *American Heart Journal* 2010;160(5):928-33.

62. Yelken B, Gorgulu N, Altun I, Yilmaz A, Caliskan YK, Yazici H, et al. Reduction of uric acid levels with allopurinol treatment improves endothelial function in the patients with chronic renal failure. *NDT Plus* 2010;3 SUPPL. 3:iii177-iii8.
63. Yiginer O, Ozcelik F, Aparci M, Isilak Z, Uz O, Author A, et al. The beneficial effects of allopurinol in cardiology practice: Decrease in uric acid and vascular oxidative stress/ the effects of lowering uric acid levels using allopurinol on markers of metabolic syndrome in end-stage renal disease patients: A pilot study ORIGINAL (NON-ENGLISH) TITLE Allopurinolun kardiyoloji pratigindeki faydali etkileri: Urik asitte ve vaskuler oksidatif strese azalma/ Urik asit seviyelerinin allopurinol ile azaltilmasinin son donem bobrek hastalarindaki metabolik sendrom belirleyicilerine etkisi: Pilot calisma. *Anadolu Kardiyoloji Dergisi* 2010;10(3):294-5.
64. Yu TF. The effect of allopurinol in primary and secondary gout. *Arthritis Rheum* 1965;8(5):905-6.
65. Zhang J, Liu XY, Du XL, Author A, Correspondence A, J. Zhang Ejsc. Febuxostat - A novel drug for the treatment of gout. *Chinese Pharmaceutical Journal* 2010;45(15):1197-8.
66. Zöllner N, Schattenkirchner M. [Allopurinol in the treatment of gout and uric acid nephrolithiasis]. *Deutsche medizinische Wochenschrift* (1946); 1967:654-60.

## Repeated records

1. Apt Baruch W, Aguilera Martín X, Arribada C A, Pérez Baladrón C, Miranda Sallorenzo C, Zulantay Alfaro I, et al. Tratamiento de la enfermedad de Chagas humana crónica con itraconazol y alopurinol: informe preliminar. Treatment of chronic human Chagas disease with itraconazole and allopurinol: preliminary report. *Rev Med Chil*;122(4):420-7.
2. Apt W, Aguilera X, Arribada A, Perez C, Miranda C, Sanchez G, et al. Treatment of chronic Chagas' disease with itraconazole and allopurinol. *American Journal of Tropical Medicine and Hygiene* 1998;59(1):133-8.
3. Baggio B, Gambaro G, Paleari C, Author A, Universita di Padova P, Correspondence A, et al. Hydrochlorothiazide and allopurinol vs. placebo on urinary excretion of stone promoters and inhibitors. *Current Therapeutic Research - Clinical and Experimental* 1983;34(1 I):145-51.

4. Banks PA, Hughes M, Ferrante M, Noordhoek EC, Ramagopal V, Slivka A. Does allopurinol reduce pain of chronic pancreatitis? *International Journal of Pancreatology* 1997;22(3):171-6.
5. Banks PA, Hughes M, Ferrante M, Noordhoek EC, Ramagopal V, Slivka A, et al. Does allopurinol reduce pain of chronic pancreatitis. *International Journal of Pancreatology* 1997;22(3):171-6.
6. Becker MA, Schumacher HR, Jr., Wortmann RL, MacDonald PA, Palo WA, Eustace D, et al. Febuxostat, a Novel Nonpurine Selective Inhibitor of Xanthine Oxidase. *Arthritis and Rheumatism* 2005;52(3):916-23.
7. Berthoux FC, Juge J, Ducret F. DOUBLE-BLIND TRIAL OF ALLOPURINOL AS A PREVENTIVE TREATMENT IN RECURRENT CALCIUM NEPHROLITHIASIS. *Mineral and Electrolyte Metabolism* 1981;6(4-5):232-.
8. Butler R, Morris AD, Struthers AD. Allopurinol improves endothelial function in patients with non-insulin dependent diabetes mellitus [abstract]. *Scottish medical journal*; 1998:61.
9. Dawson J, Higgins P, Quinn T, Harrow C, Lees K, Walters M, et al. Effect of allopurinol upon cerebrovascular reactivity following subcortical stroke. *Basic and Clinical Pharmacology and Toxicology* 2009;105 SUPPL. 1:33.
10. Gianella A, Holzman A, Lihoshi N. Efficacy of Allopurinol in chronic Chagas disease. Results of a randomized controlled trial in Santa Cruz, Bolivia. *Bol Cient CENETROP*; 1997:25-9.
11. Goldfarb DS, MacDonald PA, Hunt B, Gunawardhana L. Febuxostat in Gout: Serum Urate Response in Uric Acid Overproducers and Underexcretors. *Journal of Rheumatology* 2011;38(7):1385-9.
12. Harrow C, Muir S, Lees K, Walters M. Safety, tolerability and pharmacodynamics of Allopurinol in acute stroke patients: a pilot study. *Cerebrovascular diseases (Basel, Switzerland)*; 2005:74.
13. Horsfall PA, Plummer J, Allan WG, Girling DJ, Nunn AJ, Fox W. Double blind controlled comparison of aspirin, allopurinol and placebo in the management of arthralgia during pyrazinamide administration. *Tubercle* 1979;60(1):13-24.
14. Jahangard L, Soroush S, Haghghi M, Ghaleiha A, Bajoghli H, Holsboer-Trachsler E, et al. In a double-blind, randomized and placebo-controlled trial, adjuvant allopurinol improved symptoms of mania in in-patients suffering from bipolar disorder. *European Neuropsychopharmacology* 2014;24(8):1210-21.

15. Joelsson M, Andersson M, Bark T, Gullberg K, Hallgren T, Jiborn H, et al. Allopurinol as prophylaxis against pouchitis following heal pouch-anal anastomosis for ulcerative colitis - A randomized placebo-controlled double-blind study. *Scandinavian Journal of Gastroenterology* 2001;36(11):1179-84.
16. Kanbay M, Huddam B, Azak A, Solak Y, Kadioglu GK, Kirbas I, et al. A Randomized Study of Allopurinol on Endothelial Function and Estimated Glomular Filtration Rate in Asymptomatic Hyperuricemic Subjects with Normal Renal Function. *Clinical Journal of the American Society of Nephrology* 2011;6(8):1887-94.
17. Kao MP, Ang DS, Struthers AD, Author A, Division of Medical S, University of Dundee UK, et al. Allopurinol improves vascular function in patients with chronic kidney disease. *NDT Plus* 2010;3 SUPPL. 3:iii3.
18. Machado-Vieira R, Kapczinski F, Lara DR, Souza DO, Soares JC, Filho GM. Superior antimanic efficacy of allopurinol compared to dipyridamol and placebo as add-on treatment to lithium in unmedicated bipolar patients during a mania episode: a double-blind placebo-controlled trial. *Bipolar Disorders* 2007;9:69-70.
19. Machado-Vieira R, Kapczinski F, Souza DO, Lara DR, Soares JC. A double-blind controlled study of adjunctive allopurinol or dipyridamole to lithium in the treatment of bipolar mania: preliminary results. *Bipolar Disorders* 2005;7:73-.
20. Meirovich CI, Montrull HL, Gallerano RH, Sosa RR. [Allopurinol in the treatment of chronic Chagas' disease]. *Arq Bras Cardiol* 1985;45(3):217-23.
21. Muir SW, Harrow C, Dawson J, Lees KR, Weir CJ, Sattar N, et al. Allopurinol Use Yields Potentially Beneficial Effects on Inflammatory Indices in Those With Recent Ischemic Stroke A Randomized, Double-Blind, Placebo-Controlled Trial. *Stroke* 2008;39(12):3303-7.
22. Nakamura N. [Efficacy of Benzbromarone for Hyperuricemia (Part 2): Comparison with Allopurinol]. *Rinsho to Kenkyu (The Japanese Journal of Clinical and Experimental Medicine)*; 1972:1381-4.
23. Naoyuki K, Shin F, Toshikazu H, Tatsuo H, Kenjiro K, Toshitaka N, et al. Placebo-Controlled, Double-Blind Study of the Non-Purine-Selective Xanthine Oxidase Inhibitor Febuxostat (TMX-67) in Patients With Hyperuricemia Including Those With Gout in Japan. *Jcr-Journal of Clinical Rheumatology* 2011;17(4):S19-S26.
24. Naoyuki K, Shin F, Toshikazu H, Tatsuo H, Kenjiro K, Toshitaka N, et al. An Allopurinol-Controlled, Multicenter, Randomized, Open-Label, Parallel Between-Group, Comparative Study of Febuxostat (TMX-67), a Non-Purine-Selective Inhibitor of Xanthine

Oxidase, in Patients With Hyperuricemia Including Those With Gout in Japan. *Jcr-Journal of Clinical Rheumatology* 2011;17(4):S44-S9.

25. Nct. Treatment of Uric Acid With the Xanthine Oxidase Inhibitor Febuxostat: Effects on Blood Pressure, Metabolic Markers, and Aortic Stiffness in Prehypertensive. *ClinicalTrials.gov* [<http://clinicaltrials.gov>]; 2011.

26. Nct. Febuxostat, Blood Pressure and the Intrarenal Renin-Angiotensin System (RAS). *ClinicalTrials.gov* [<http://clinicaltrials.gov>]; 2011.

27. Nct. A Phase 2, Double-Blind, Placebo-Controlled Study to Assess the Effect of Febuxostat 80 mg Once Daily Compared to Placebo on Ambulatory Blood Pressure in Subjects With Hyperuricemia and Hypertension. *ClinicalTrials.gov* [<http://clinicaltrials.gov>]; 2012.

28. Noman A, Ang DSC, Ogston S, Lang CC, Struthers AD. Effect of high-dose allopurinol on exercise in patients with chronic stable angina: a randomised, placebo controlled crossover trial. *Lancet* 2010;375(9732):2161-7.

29. Noman A, Rekhraj S, Lang CC, Struthers AD, Author A, University of D, et al. The effect of high dose allopurinol on the augmentation index in patients with coronary artery disease. *European Heart Journal* 2011;32 SUPPL. 1:574.

30. O'Driscoll JG, Green DJ, Rankin JM, Taylor RR, Author A, Department of Med a, et al. Nitric oxide-dependent endothelial function is unaffected by allopurinol in hypercholesterolaemic subjects. *Clinical and Experimental Pharmacology and Physiology* 1999;26(10):779-83.

31. O'Duffy JD, Scherbel AL. Treatment of gout and urate calculi with allopurinol. *Cleve Clin Q* 1968;35(3):145-54.

32. PerezRuiz F, AlonsoRuiz A, Calabozo M, RuizLucea E, Aretxabala I, Fraiz E. Comparative study of the efficacy of benzbromarone and allopurinol for the therapy of hyperuricemia in chronic primary gout. *Arthritis and Rheumatism* 1996;39(9):355-.

33. Perez-Ruiz F, Sundry J, Krishnan E, Hingorani V, Welp J, Rodgers T, et al. EFFICACY AND SAFETY OF LESINURAD (RDEA594), A NOVEL URAT1 INHIBITOR, IN COMBINATION WITH ALLOPURINOL IN ALLOPURINOL-REFRACTORY GOUT PATIENTS: RESULTS FROM A RANDOMIZED, BLINDED, PLACEBO-CONTROLLED, PHASE 2B EXTENSION STUDY. *Annals of the Rheumatic Diseases* 2012;71:439-.

34. Persson BE, Ronquist G, Ekblom M. Ameliorative effect of allopurinol on nonbacterial prostatitis: A parallel double-blind controlled study. *Journal of Urology* 1996;155(3):961-4.

35. Poor G, Jofsay J, Judak A, Ludanyi E, Mituszova M. [The effect of allopurinol therapy on kidney processes concomitant with gout]. *Orv Hetil* 1987;128(37):1939-43.
36. Puntoni M, Branchi D, Argusti A, Zanardi S, Crosta C, Meroni E, et al. Randomized, presurgical study of allopurinol vs. placebo in subjects with colorectal adenomas. *Cancer Prevention Research* 2010;3:12 SUPPL. 2.
37. Rajendra NS, Ireland S, George J, Belch JJ, Lang CC, Struthers AD. Mechanistic insights into the therapeutic use of high-dose allopurinol in angina pectoris. *J Am Coll Cardiol* 2011;58(8):820-8.
38. Rashid MA, William-Olsson G. Influence of allopurinol on cardiac complications in open heart operations. *Ann Thorac Surg* 1991;52(1):127-30.
39. Reinders MK, Haagsma C, Jansen TLTA, Van Roon EN, Delsing J, Van De Laar MAFJ, et al. A randomised controlled trial on the efficacy and tolerability with dose escalation of allopurinol 300-600 mg/day versus benzbromarone 100-200 mg/day in patients with gout. *Annals of the Rheumatic Diseases* 2009;68(6):892-7.
40. Reinders MK, Roon EN, Jansen TL, Delsing J, Griep EN, Hoekstra M, et al. Efficacy and tolerability of urate-lowering drugs in gout: a randomised controlled trial of benzbromarone versus probenecid after failure of allopurinol. *Annals of the rheumatic diseases*; 2009:51-6.
41. Salim AS. Scavenging free radicals to prevent stress-induced gastric mucosal injury. *Lancet*; 1989:1390.
42. Salim AS. Oxygen-derived free radicals and the prevention of duodenal ulcer relapse: a new approach. *American journal of the medical sciences*; 1990:1-6; discussion 7-8.
43. Schumacher HR, Becker MA, Wortmann RL, MacDonald PA, Hunt B, Streit J, et al. Febuxostat vs allopurinol and placebo in subjects with hyperuricemia and gout: The 28-week APEX study. *Arthritis and Rheumatism* 2005;52(9):S680-S.
44. Scott JT, Hall AP, Grahame R. Allopurinol in treatment of gout. *British medical journal*; 1966:321-7.
45. Scott R, Lewi H. Therapeutic management of upper urinary tract stone disease in 172 subjects. *Urology*; 1989:277-81.

46. Sezai A, Soma M, Nakata K-i, Hata M, Yoshitake I, Wakui S, et al. Comparison of Febuxostat and Allopurinol for Hyperuricemia in Cardiac Surgery Patients (NU-FLASH Trial). *Circulation Journal* 2013;77(8):2043-9.
47. Shehab AM, Butler R, MacFadyen RJ, Struthers AD. A placebo-controlled study examining the effect of allopurinol on heart rate variability and dysrhythmia counts in chronic heart failure. *Br J Clin Pharmacol* 2001;51(4):329-34.
48. Siu YP, Leung KT, Tong MKH, Kwan TH. Use of allopurinol in slowing the progression of renal disease through its ability to lower serum uric acid level. *American Journal of Kidney Diseases* 2006;47(1):51-9.
49. Smith V. PLACEBO VERSUS ALLOPURINOL FOR RECURRENT URINARY CALCULI. *Kidney International* 1983;24(3):419-20.
50. Stern LM, Fewings JD, Bretag AH, Author A, Regency Park Cent P, Handicapped Child A, et al. The progression of Duchenne muscular dystrophy: Clinical trial of allopurinol therapy. *Neurology* 1981;31(4 I):422-6.
51. Taheraghdam AA. The effect of allopurinol on ischemic stroke functional prognosis. 2011.
52. Templeton JS. Azapropazone or allopurinol in the treatment of chronic gout and/or hyperuricaemia. A preliminary report. *British journal of clinical practice*; 1982:353-8.
53. Togha M, Ahmadi B, Akhondzadeh S, Razeghi S. Allopurinol in refractory epilepsy: A double blind study. *Tehran University Medical Journal*; 2008:23-7.
54. Togha M, Ahmadi B, Akhondzadeh S, Razeghi S, Author A, Department o, et al. Allopurinol in refractory epilepsy: A double blind study. *Tehran University Medical Journal* 2008;65(11):23-7.
55. Tousoulis D, Andreou I, Tentolouris C, Antoniadis C, Papageorgiou N, Gounari P, et al. Comparative effects of rosuvastatin and allopurinol on circulating levels of matrix metalloproteinases and tissue inhibitors of metalloproteinases in patients with chronic heart failure. *International Journal of Cardiology* 2010;145(3):438-43.
56. Vogler WR, Drane JW. Effect of allopurinol on urinary ammonia excretion in patients with gout. *Metabolism* 1969;18(6):519-44.
57. Weiser M, Burshtein S, Gershon AA, Marian G, Vlad N, Grecu IG, et al. Allopurinol for mania: a randomized trial of allopurinol versus placebo as add-on treatment to mood stabilizers and/or antipsychotic agents in manic patients with bipolar disorder. *Bipolar Disorders* 2014;16(4):441-7.

58. Wells AF, MacDonald PA, Chefo S, Jackson RL. African American patients with gout: efficacy and safety of febuxostat vs allopurinol. *Bmc Musculoskeletal Disorders* 2012;13.
59. Whelton A, MacDonald PA, Hunt B, Gunawardhana L, Author A, Johns H, et al. The impact on renal function of quantitative serum urate reduction in gout patients. *Arthritis and Rheumatism* 2011;63:10 SUPPL. 1.
60. Yiginer O, Ozcelik F, Inanc T, Aparci M, Ozmen N, Cingozbay BY, et al. Allopurinol improves endothelial function and reduces oxidant-inflammatory enzyme of myeloperoxidase in metabolic syndrome. *Clinical Research in Cardiology* 2008;97(5):334-40.
61. Yiginer O, Ozcelik F, Inanc T, Aparci M, Ozmen N, Cingozbay BY, et al. Allopurinol improves endothelial function and reduces oxidant-inflammatory enzyme of myeloperoxidase in metabolic syndrome. *Clinical Research in Cardiology* 2008;97(5):334-40.



## **2) Second systematic literature search, from Sep 29, 2014 to January 11, 2016 (subtitles represent the reasons for exclusion).**

### **Abstracts or full-text articles with no extractable data**

1. Alem M, Alshehri A, Cahusac P, Walters M. Effect of xanthine oxidase inhibition on arterial stiffness in patients with chronic heart failure. *Journal of hypertension*; 2015:e47.
2. Babes EE, Babes VV, Popescu MI, Author A, Faculty of Medicine OR, Correspondence A, et al. Allopurinol and endothelial function. *European Heart Journal* 2014;35 SUPPL. 1:1125.
3. Separham A, Ghaffari S, Nafafi H, Ghojazadeh M, Author A, Cardiovascular Research Center T, et al. Allopurinol in patients with acute St elevation myocardial infarction undergoing thrombolytic therapy : A randomized trial. *Cardiology* 2015;(2015) 132 SUPPL. 1:205.
4. Simone VV, Cicoira M, Rossi A, Bergamini C, Zanolla L, Battaia E, et al. Xanthine oxidase inhibition in chronic heart failure: Effects on diastolic function and NT-proBNP levels in a double-blind, randomised, placebo-controlled study. *European journal of heart failure*; 2015:340.
5. Tani S, Nagao K, Hirayama A. Febuxostat, xanthine oxidase inhibitor, may improve cardiorenal interaction: a randomized controlled pilot study. *European Heart Journal* 2014;35:904-5.

### **Results could not be translated**

1. Pour-Pouneh M, Narimani R, Mardani S, Momeni A, Nasri H, Author A, et al. Evaluation of the relationship between the reduction of serum uric acid level and control of blood pressure in patients with hypertension and hyperuricemia. *Journal of Isfahan Medical School* 2015;33(353):1672-85.

### **Follow-up or treatment duration <28 days**

1. Sanchis-Gomar F, Salvagno GL, Lippi G. Inhibition of xanthine oxidase and exercise on serum uric acid, 25(OH)D3, and calcium concentrations. *Clinical laboratory*; 2014:1409-11.
2. Sanchis-Gomar F, Pareja-Galeano H, Gomez-Cabrera MC, Candel J, Lippi G, Salvagno GL, et al. Allopurinol prevents cardiac and skeletal muscle damage in professional soccer players. *Scand J Med Sci Sports* 2015;25(1):e110-5.

### **Different publications of studies already evaluated**

1. Liu P, Chen Y, Wang B, Zhang F, Wang D, Wang Y. Allopurinol treatment improves renal function in patients with type 2 diabetes and asymptomatic hyperuricemia: 3-year randomized parallel-controlled study. *Clinical endocrinology*; 2015:475-82.

### **3) Third systematic literature search from Jan 11, 2016 to December 30, 2016 and hand searching process updated to December 30, 2016 (subtitles represent the reasons for exclusion).**

OBS: Some of the articles presented in this section were already found in previous searches. The hand searching process was purposely redundant in order to increase sensitivity for eligible articles.

#### **No placebo or no-treatment group**

1. NCT01001338- Ardea Biosciences Incorporation. Lesinurad in combination with allopurinol: results of a phase 2, randomised, double-blind study in patients with gout with an inadequate response to allopurinol. In: ClinicalTrials.gov[Internet]. Bethesda (MD): National Library of Medicine (US). 2000- [cited 2016 Dec 27] . Available from: <https://clinicaltrials.gov/ct2/show/NCT01001338>.
2. Hosoya T, Ogawa Y, Hashimoto H, Ohashi T, Sakamoto R. Comparison of topiroxostat and allopurinol in Japanese hyperuricemic patients with or without gout: a phase 3, multicentre, randomized, double-blind, double-dummy, active-controlled, parallel-group study. *J Clin Pharm Ther* 2016;41:290-7.
3. Peixoto MR, Monego ET, Jardim PC, Carvalho MM, Sousa AL, Oliveira JS, et al. Diet and medication in the treatment of hyperuricemia in hypertensive patients. *Arq Bras Cardiol* 2001;76:463-72.
4. Viglioglia PA, Plante GE, Viglioglia J, Saraceno EF. Allopurinol in psoriasis. *Dermatologica* 1970;141:203-7.
5. Chunyan W, Lixun Z. The cloth division him for treatment of gout with high uric acid hematic disease analysis. *Health Way* 2016;15:15. (article in chinese)
6. Singh G, Kumar H, Soni U, Tyagi S, Aggarwal K, Verma K, et al. "COMPARISON OF URATE-LOWERING EFFICACY AND SAFETY OF FEBUXOSTAT AND ALLOPURINOL IN GOUT PATIENTS". *Heterocyclic Letters* 2016;6(1):133-47.

#### **Intervention group received XO1 or uricosuric at investigator's discretion**

1. Tan Y, Fu JZ, Liang M, Lin ZX, Huang J. Clinical observation of the effect of allopurinol to protect renal function in patients with diabetic nephropathy. *Modern Hospital* 2011;11:36–8. (article in chinese)

## **Review, editorial, observational or quasi-experimental studies**

1. Smith MJ. Placebo versus allopurinol for recurrent urinary calculi. *Proc Eur Dial Transplant Assoc* 1983;20:422-6.

2. Smith MJ. Placebo versus allopurinol for renal calculi. *J Urol* 1977;117:690-2.

3. Smith MJ. Allopurinol and calcium-stone formers. *Lancet* 1973;1:315.

4. Zöllner N, Schattenkirchner M. Allopurinol in the treatment of gout and uric acid nephrolithiasis. *Dtsch Med Wochenschr* 1967;92:654-60.

5. Rundles RW, Metz EN, Silberman HR. Allopurinol in the treatment of gout. *Ann Intern Med.* 1966;64:229-58.

6. Bai W, Zhou W. Clinical research on diagnosis and treatment of patients with renal function damage induced by chronic uric acid nephropathy. *China Medicine and Pharmacy* 2014;7:214-216.  
<http://caod.oriprobe.com/journals/zgyyqx/%e4%b8%ad%e5%9b%bd%e5%8c%bb%e8%8d%af%e7%a7%91%e5%ad%a6.htm> (article in chinese)

7. Satirapoj B, Wirajit O, Burata A, Supasyndh O, Ruangkanhasetr P. Benefits of allopurinol treatment on blood pressure and renal function in patients with early stage of chronic kidney disease. *Journal of the Medical Association of Thailand* 2015;98(12):1155-61.

8. Steubl D, Michel MC. Experimental and clinical nephroprotection by the xanthine oxidase inhibitor febuxostat. *Naunyn-Schmiedeberg's Archives of Pharmacology* 2016;389(8):815-7.

9. Filiopoulos V, Hadjiyannakos D, Vlassopoulos D. Febuxostat renoprotection in CKD patients with asymptomatic hyperuricemia. *American Journal of Kidney Diseases* 2016;67(6):989-90.

## Study protocol

1. Oyama J, Tanaka A, Sato Y, Tomiyama H, Sata M, Ishizu T, et al. Rationale and design of a multicenter randomized study for evaluating vascular function under uric acid control using the xanthine oxidase inhibitor, febuxostat: the PRIZE study. *Cardiovasc Diabetol* 2016;15:87.
2. Saddekni MB, Saag KG, Dudenbostel T, Oparil S, Calhoun DA, Sattui SE, et al. The effects of urate lowering therapy on inflammation, endothelial function, and blood pressure (SURPHER) study design and rationale. *Contemp Clin Trials* 2016;50:238-44.
3. Mackenzie IS, Ford I, Walker A, Hawkey C, Begg A, Avery A, et al. Multicentre, prospective, randomised, open-label, blinded end point trial of the efficacy of allopurinol therapy in improving cardiovascular outcomes in patients with ischaemic heart disease: protocol of the ALL-HEART study. *BMJ Open* 2016;6(9):e013774.

## Inclusion of individuals <18 years-old

1. Apt W, Aguilera X, Arribada A, Pérez C, Miranda C, Sánchez G, et al. Treatment of chronic Chagas' disease with itraconazole and allopurinol. *Am J Trop Med Hyg* 1998;59:133-8.
2. Llanos-Cuentas A, Echevarría J, Cruz M, La Rosa A, Campos P, Campos M, et al. Efficacy of sodium stibogluconate alone and in combination with allopurinol for treatment of mucocutaneous leishmaniasis. *Clin Infect Dis* 1997;25:677-84.
3. Velez I, Agudelo S, Hendrickx E, Puerta J, Grogil M, Modabber F, et al. Inefficacy of allopurinol as monotherapy for Colombian cutaneous leishmaniasis. A randomized, controlled trial. *Ann Intern Med* 1997;126:232-6.
4. Horsfall PA, Plummer J, Allan WG, Girling DJ, Nunn AJ, Fox W. Double blind controlled comparison of aspirin, allopurinol and placebo in the management of arthralgia during pyrazinamide administration. *Tubercle* 1979;60:13-24.

## Different publications of studies already evaluated

1. NCT02063997 - CymaBay Therapeutics Incorporation. Evaluate the Efficacy and Safety of Arhalofenate for Preventing Flares and Reducing Serum Uric Acid in Gout Patients. In: ClinicalTrials.gov[Internet]. Bethesda (MD): National Library of Medicine (US). 2000- [cited 2016 Dec 27] . Available from: <https://clinicaltrials.gov/ct2/show/NCT02063997>.
2. NCT01228903 – University of Colorado, Denver. Uric Acid and the Endothelium in CKD. In: ClinicalTrials.gov[Internet]. Bethesda (MD): National Library of Medicine (US). 2000- [cited 2016 Dec 27]. Available from: <http://www.clinicaltrial.co/ShowTrial/NCT01228903>.
3. NCT02327754 – Sanwa Kagaku Kenkyusho Company. Effect of Topiroxostat on Urinary Albumin Excretion Early Stage Diabetic Nephropathy and Hyperuricemia With or Without Gout. In: ClinicalTrials.gov[Internet]. Bethesda (MD): National Library of Medicine (US). 200- [cited 2016 Dec 27] . Available from: <https://clinicaltrials.gov/ct2/show/NCT02327754>.
4. Dalbeth N, Saag K, Palmer W, et al. Multicenter, Randomized, Double-Blind, Phase 2 Study to Evaluate the Effect of Febuxostat Versus Placebo on Joint Damage in Hyperuricemic Subjects with Early Gout. *Annals of the Rheumatic Diseases* 2015;74:543.
5. Steinberg A, Chera H, Choi YJ, Martin R, McWherter C, Zhang Y, Boudes P. A Study to Evaluate the Efficacy and Safety of Arhalofenate for Preventing Flares and Reducing Serum Uric Acid in Gout Patients [abstract]. *Arthritis Rheumatol.* 2015; 67 (suppl 10). <http://acrabstracts.org/abstract/a-study-to-evaluate-the-efficacy-and-safety-of-arhalofenate-for-preventing-flares-and-reducing-serum-uric-acid-in-gout-patients/>
6. Dalbeth N, Saag KG, Palmer W, Choi H, Hunt B, MacDonald P, Thienel U, Gunawardhana L. Imaging and Safety Assessments Following Treatment with Febuxostat and Placebo for 2 Years in Subjects with Early Gout [abstract]. *Arthritis Rheumatol.* 2015; 67 (suppl 10). <http://acrabstracts.org/abstract/imaging-and-safety-assessments-following-treatment-with-febuxostat-and-placebo-for-2-years-in-subjects-with-early-gout/>.
7. Hill E, Higgs JBm Sky K, Sit M, Collamer NA, Author A, et al. Does starting allopurinol prolong acute treated gout: *Arthritis Rheum* 2013,65(Suppl 10):S730
8. Gunawardhana L, Becker MA, Whelton A, Hunt B, Castillo M, Dong X, Saag K. A Phase 2 Study to Evaluate the Efficacy and Safety of Febuxostat Extended- Versus Immediate-Release Formulations in Patients with Gout and Moderate Renal Impairment [abstract]. *Arthritis Rheumatol.* 2016; 68 (suppl 10). <http://acrabstracts.org/abstract/a->

phase-2-study-to-evaluate-the-efficacy-and-safety-of-febuxostat-extended-versus-immediate-release-formulations-in-patients-with-gout-and-moderate-renal-impairment

9. Saag K, Becker MA, Whelton A, Hunt B, Castillo M, Kisfalvi K, Gunawardhana L. A Phase 3 Study to Evaluate the Efficacy and Safety of Febuxostat Extended- Versus Immediate-Release Formulations in Patients with Gout [abstract]. *Arthritis Rheumatol.* 2016; 68 (suppl 10). <http://acrabstracts.org/abstract/a-phase-3-study-to-evaluate-the-efficacy-and-safety-of-febuxostat-extended-versus-immediate-release-formulations-in-patients-with-gout>
10. Dalbeth N, Saag KG, Palmer W, Choi HK, Hunt B, MacDonald P, Thienel U, Gunawardhana L. Overall Reduction in Acute Flares during Treatment with Febuxostat Compared with Placebo over 2 Years in Patients with Early Gout [abstract]. *Arthritis Rheumatol.* 2016; 68 (suppl 10). <http://acrabstracts.org/abstract/overall-reduction-in-acute-flares-during-treatment-with-febuxostat-compared-with-placebo-over-2-years-in-patients-with-early-gout/>.
11. Hara S, Ohno I, Nomura S, Hisatome I, Uchida S, Fujimori S, et al. Effects of topiroxostat on the serum urate levels and urinary albumin excretion in hyperuricemic stage 3 ckd patients with or without gout. *Nephrology Dialysis Transplantation* 2015;30:iii159.
12. NCT 01988402 –Wilford Hall Medical Center. Does Allopurinol prolong a treated, acute gout flare? In: *ClinicalTrials.gov*[Internet]. Bethesda (MD): National Library of Medicine (US). 2000- [cited 2016 Dec 27]. Available from: <https://clinicaltrials.gov/ct2/show/NCT01988402>
13. NCT 00512057 –University of Dundee. APEX Study: Effects of Allopurinol on Coronary and Peripheral Endothelial Function in Patients With Cardiac Syndrome X.In: *ClinicalTrials.gov*[Internet]. Bethesda (MD): National Library of Medicine (US). 2000- [cited 2016 Dec 27]. Available from: <https://clinicaltrials.gov/ct2/show/NCT00512057?id=NCT00512057&rank=1&load=cart>
14. NCT00997542 –National Heart and Lung Institute. A Double-blind, Placebo-controlled, Cross-over Study of the Effects of Allopurinol on Oxidative Metabolism, Peripheral Blood Flow and Immune Function in Patients With Advanced Chronic Heart Failure (CHF).In: *ClinicalTrials.gov*[Internet]. Bethesda (MD): National Library of Medicine (US). 2000- [cited 2016 Dec 27]. Available from: <https://clinicaltrials.gov/ct2/show/NCT00997542>
15. NCT01157936 –Instituto Nacional de Cardiologia Ignacio Chavez. Effect of Hyperuricemia Treatment on Hypertension and Metabolic Syndrome. In: *ClinicalTrials.gov*[Internet]. Bethesda (MD): National Library of Medicine (US). 2000- [cited 2016 Dec 27]. Available from: <https://clinicaltrials.gov/ct2/show/NCT01157936>

16. NCT00821392 - SK Chemicals Co.,Ltd. A Randomized, Multi-Center, Double Blinded, Allopurinol-Controlled, Placebo-Controlled Parallel Group, 5-Arm, Dose-Response, Bridging Study to Assess the Efficacy and Safety of Febuxostat in Subject With Gout. In: ClinicalTrials.gov[Internet]. Bethesda (MD): National Library of Medicine (US). 2000- [cited 2016 Dec 27]. Available from: <https://clinicaltrials.gov/ct2/show/NCT00821392>
17. NCT02038179 - University of Alabama at Birmingham. UAB Center of Research Translation (CORT) Project 2: The Effects of Urate Lowering Therapy (ULT) in Inflammation, Endothelial Function, and Blood Pressure. In: ClinicalTrials.gov[Internet]. Bethesda (MD): National Library of Medicine (US). 2000- [cited 2016 Dec 27]. Available from: <https://clinicaltrials.gov/ct2/show/NCT02038179>
18. NCT01082640 – Takeda. A Multicenter, Randomized, Double-Blind, Phase 2 Study to Evaluate the Effect of Febuxostat Versus Placebo on Renal Function in Gout Subjects With Hyperuricemia and Moderate to Severe Renal Impairment. . In: ClinicalTrials.gov[Internet]. Bethesda (MD): National Library of Medicine (US). 2000- [cited 2016 Dec 27]. Available from: <https://clinicaltrials.gov/ct2/show/NCT01082640>

### **Study duration less than 28 days**

1. Von Haeling S, Bode-Böger SM, Martens-Lobenhoffer J, Rauchhaus M, Schefold JC, Genth-Zotz S, et al. Elevated levels of asymmetric dimethylarginine in chronic heart failure: a pathophysiologic link between oxygen radical load and impaired vasodilator capacity and the therapeutic effect of allopurinol. *Clin Pharmacol Ther* 2010;88:506-12.
2. Martinez S, Gonzalez M, Vernaza ME. Treatment of cutaneous leishmaniasis with allopurinol and stibogluconate. *Clin Infect Dis* 1997;24:165-9.
3. Ababei M, Campeanu A, Nistorescu D, Zaharia O, Gheorghe G, Nanea T. The effect of Allopurinol on endothelial function, serum uric acid and NTproBNP in acute decompensated heart failure. *European Heart Journal* 2016;37:204.

### **Duration of follow-up different from period on medication**

1. Xiao J, Deng SB, She Q, Li J, Kao GY, Wang JS, Ma Y. Allopurinol ameliorates cardiac function in non-hyperuricaemic patients with chronic heart failure. *Eur*



Rev Med Pharmacol Sci. 2016;20(4):756-61.

2. Goicoechea M, Garcia de Vinuesa S, Verdalles U, Verde E, Macias N, Santos A, Pérez de Jose A, Cedeño S, Linares T, Luño J. Allopurinol and progression of CKD and cardiovascular events: long-term follow-up of a randomized clinical trial. *Am J Kidney Dis* 2015;65:543-9.

### **Ongoing studies or complete results not available**

1. NCT02078219 - AstraZeneca. A Randomized, Double-Blind, Multicenter, Placebo-Controlled, Parallel Group, 24-Week Phase II Study to Evaluate Efficacy and Safety of RDEA3170 5 mg, 7.5 mg, 10 mg, 12.5 mg and 15 mg Versus Placebo and Open-Label Allopurinol 200 mg as a Reference Arm in Japanese Patients With Gout or Asymptomatic Hyperuricemia. In: *ClinicalTrials.gov*[Internet]. Bethesda (MD): National Library of Medicine (US). 2000- [cited 2016 Dec 27]. Available from: <https://clinicaltrials.gov/ct2/show/NCT02078219>

2. NCT00477789 - Universita di Verona. Effects of Allopurinol on Diastolic Function in Chronic Heart Failure Patients. In: *ClinicalTrials.gov*[Internet]. Bethesda (MD): National Library of Medicine (US). 2000- [cited 2016 Dec 27]. Available from: <https://clinicaltrials.gov/ct2/show/NCT00477789>

3. NCT01332799 - University of Iowa. Xanthine Oxidase Inhibition in Renal Transplant Recipients. In: *ClinicalTrials.gov*[Internet]. Bethesda (MD): National Library of Medicine (US). 2000- [cited 2016 Dec 27]. Available from: <https://clinicaltrials.gov/ct2/show/NCT01332799>

4. NCT01320722 - Brigham and Women's Hospital. Modifiable Effectors of Renin System Activation: Treatment Evaluation (MODERATE). In: *ClinicalTrials.gov*[Internet]. Bethesda (MD): National Library of Medicine (US). 2000- [cited 2016 Dec 27]. Available from: <https://clinicaltrials.gov/ct2/show/NCT01320722>

5. NCT01984749 - Freed Study Group. A Multicenter, Randomized, Comparative Trial on the Effect of Febuxostat in Preventing Cerebral and Cardiovascular Events in Patients With Hyperuricemia. . In: *ClinicalTrials.gov*[Internet]. Bethesda (MD): National Library of Medicine (US). 2000- [cited 2016 Dec 27]. Available from: <https://clinicaltrials.gov/ct2/show/NCT01984749>

6. NCT01472692 - University of California, San Diego. treatment of Uric Acid With the Xanthine Oxidase Inhibitor Febuxostat: Effects on Blood Pressure, Metabolic Markers, and

Aortic Stiffness in Prehypertensive. In: ClinicalTrials.gov[Internet]. Bethesda (MD): National Library of Medicine (US). 2000- [cited 2016 Dec 27]. Available from: <https://clinicaltrials.gov/ct2/show/NCT01472692>

7. NCT02866214 - Ain Shams University. Evaluation of the Effect of Febuxostat on Endothelial Dysfunction in Hemodialysis Patients. In: ClinicalTrials.gov[Internet]. Bethesda (MD): National Library of Medicine (US). 2000- [cited 2016 Dec 27]. Available from: <https://clinicaltrials.gov/ct2/show/NCT02866214>

8. NCT01328769 - Paul N. Hopkins. Febuxostat, Blood Pressure and the Intrarenal Renin-Angiotensin System (RAS). In: ClinicalTrials.gov[Internet]. Bethesda (MD): National Library of Medicine (US). 2000- [cited 2016 Dec 27]. Available from: <https://clinicaltrials.gov/ct2/show/NCT01328769>

9. NCT02017171 - Alessandro Doria. PERL: A Multicenter Clinical Trial of Allopurinol to Prevent GFR Loss in T1D. In: ClinicalTrials.gov[Internet]. Bethesda (MD): National Library of Medicine (US). 2000- [cited 2016 Dec 27]. Available from: <https://clinicaltrials.gov/ct2/show/NCT02017171>

10. Johnson D. A randomised Controlled trial of slowing of Kidney Disease progression From the Inhibition of Xanthine oxidase (CKD-FIX). In: [aktn.org.au](http://aktn.org.au) [Internet]. Australasian Kidney Trials Network (AU). - [cited 2016 Dec 27]. Available from: <https://aktn.org.au/ckd-fix/>

## **Abstracts or full-text articles with no extractable data**

1. Li J, Zhang Y, Xu Y, Wang J, Xiao J. Allopurinol for Ameliorating Exercise Tolerance of Non - Hyperuricemic Patients with Chronic Heart Failure in 62 Cases. *China Pharmaceuticals* 2015;54:2129-2137. (article in chinese)

2. Zheng-Xiang T, Quan-qing L, Li Z. Clinical research on allopurinol lowering of uric acid level of chronic kidney disease patient. *Journal of Hunan Normal University (Medical Science)* 2015;12:54-56. (article in chinese)

3. Zhou L, Ren J, Li J. Effect of controlled-release nifedipine plus allopurinol on pulse pressure and atherosclerosis in patients with hypertension and high uric acid. : *China Modern Doctor* 2012;19:66-68. (article in chinese)

4. Yin G, Xia QL, Li YF. Curative effect of allopurinol in patients with acute myocardial infarction complicating hyperuricemia. *China Journal Evidence Based Cardiovascular Medicine* 2014;6:436-437. (article in chinese)

5. Junxia Z, Cheng C, Bilin Z, Yangyang C. Effect of allopurinol on the endothelial function of patients with impaired fasting glucose complicated with hyperuricemia. *Chinese Journal of Diabetes Mellitus* 2016;10:618-622. (article in chinese)
6. Yan CQ, Liu XY, Wang J, Chen T, Xiao X. Effect of allopurinol on heart function in chronic congestive heart failure. *Journal of Jingtangshan University(Natural Science)* 2009;2:81-82. (article in chinese)
7. Luo LM, Chen QK, Yang XJ. Influence of acid-lowering therapy on IL-1 Band NALP3 levels in gout patients with hyperuricemia. *Acta Academiae Medicinae Jiangxi* 2016;56:63-66. (article in chinese)
8. Miao X, Xu X. The research on the relationship between uric acid and type 2 diabetic nephropathy. *Jilin Medical Journal* 2014;22:4862-4864. (article in chinese)
9. Yang H, Zeng Y, Liao Q. Effects of allopurinol on vascular endothelial function in patients with chronic heart failure. *Journal of Postgraduates of Medicine* 2005;28:32-34. (article in chinese)
10. Zhou X, Yin Z. Clinical observation of febuxostat in the treatment of chronic kidney disease with hyperuricemia. *Acta Academiae Medicinae Xuzhou* 2015; 12:870-872. (article in chinese)
11. Leng L, Ma Y, Ma Y, Zheng H, Feng Y. The cardiac function effect of allopurinol for hyperuricemia combined with dilated cardiomyopathy patients. *Chinese Journal of Postgraduates of Medicine* 2014;14:48-51. (article in chinese)
12. Sui L, Yang R, Du J, Yang B, Yang M. Efficacy of Febuxostat in surgical treatment of tophus. *China Journal of Modern Medicine* 2015. 29:73-77. (article in chinese)
13. Xiao H, Chen G, Lin K, Nin G. Effect of allopurinol on exercise in patients with chronic stable angina. *Chinese Journal of Thrombosis and Hemostasis* 2014;3:117-120. (article in chinese)
14. Guo L, Liu L, Li T, Ma Y, Zhu M, Zhang S. Study of the Allopurinol on Atrial Fibrillation of the Patients with Heart Failure Complicated with Hyperuricemia. *Medical Information* 2016;24:109-10. (article in chinese)
15. Akiyama D, Furuya F, Wakasugi M, Kitamura K. Efficacy of febuxostat in type 2 diabetic patients with kidney impairment. *Nephrology dialysis transplantation*. Conference: 53rd ERA-EDTA congress. Vienna austria. Conference start: 20160521. Conference end: 20160524. Conference publication: (var.pagings); 2016:i202-i3.

16. Nagatomo Y, Funamizu T, Izumi Y, Yagawa M, Mahara K, Hen Y, et al. Effects of febuxostat on cardiorenal function in patients with heart failure and hyperuricemia: effect study. *European journal of heart failure*. Conference: heart failure 2016 and the 3rd world congress on acute heart failure. Florence italy. Conference start: 20160521. Conference end: 20160524. Conference publication: (var.pagings); 2016:191-2.
17. Omrani H, Sadeghi SMK, Raeisi D, Hashemian A. The effect of allopurinol treatment regimen on serum uric acid and arterial blood pressure in hemodialysis patients. *Journal of kermanshah university of medical sciences*; 2016:56-61.
18. Pichholiya M, Yadav AK, Luhadia SK, Tahashildar J, Aseri ML. A comparative study of efficacy and safety of febuxostat and allopurinol in pyrazinamide-induced hyperuricemic tubercular patients. *Indian Journal of Pharmacology* 2016;48(5):522-5.
19. NCT01763996- Takeda. The Influence of Febuxostat on Coronary Artery Endothelial Dysfunction in Subjects With Chronic Stable Angina: A Phase 4 Randomized, Placebo-Controlled, Double-Blind, Cross-Over Study. In: *ClinicalTrials.gov*[Internet]. Bethesda (MD): National Library of Medicine (US). 2000- [cited 2016 Dec 27]. Available from: <https://clinicaltrials.gov/ct2/show/study/NCT01763996>

### **Publications not obtained**

1. Einaudi G, Marrazzi G, Pecchiura G. Observations on a random group of gout patients. *Reumatismo* 1972;24:21-9.
2. Muszkowska-Penson J, Chodorowski Z. Allopurinol in the treatment of gout. *Pol Tyg Lek* 1969;24:286-8.
3. Nyfos. Treatment of the gouty diathesis with a xanthine oxidase inhibitor. A clinical trial of allopurinol. *Ugeskr Laeger* 1967;129:253-7.

### **Results could not be translated**

1. Eyman E, Brzozowska-Jurkowska A, Weryńska-Przybylska J. Clinical evaluation of Milurit. *Reumatologia*. 1973;11:299-304.

## Already found in systematic literature search

1. Madero M, Rodríguez Castellanos FE, Jalal D, Villalobos-Martín M, Salazar J, Vazquez-Rangel A, et al. A pilot study on the impact of a low fructose diet and allopurinol on clinic blood pressure among overweight and prehypertensive subjects: a randomized placebo controlled trial. *J Am Soc Hypertens* 2015;9:837-44.
2. Robertson AJ, Struthers AD. A Randomized Controlled trial of Allopurinol in Patients With Peripheral Arterial Disease. *Can J Cardiol* 2016;32:190-6.
3. Kamatani N, Fujimori S, Hada T, Hosoya T, Kohri K, Nakamura T, et al. Placebo-controlled double-blind dose-response study of the non-purine-selective xanthine oxidase inhibitor febuxostat (TMX-67) in patients with hyperuricemia (including gout patients) in japan: late phase 2 clinical study. *J Clin Rheumatol* 2011;17:S35-43.
4. Tousoulis D, Andreou I, Tsiatas M, Miliou A, Tentolouris C, Siasos G, et al . Effects of rosuvastatin and allopurinol on circulating endothelial progenitor cells in patients with congestive heart failure: the impact of inflammatory process and oxidative stress. *Atherosclerosis* 2011;21:151-7.
5. George J, Carr E, Davies J, Belch JJ, Struthers A. High-dose allopurinol improves endothelial function by profoundly reducing vascular oxidative stress and not by lowering uric acid. *Circulation* 2006;114:2508-16.
6. Merimsky O, Inbar M, Chaitchik S. Treatment of advanced colorectal cancer by 5-fluorouracil-leucovorin combination with or without allopurinol: a prospective randomized study. *Anticancer Drugs* 1991;2:447-51.
7. Gibson T, Simmonds HA, Potter C, Rogers V. A controlled study of the effect of long term allopurinol treatment on renal function in gout. *Adv Exp Med Biol* 1980;122A:257-62.
8. Liu P, Wang H, Zhang F, Chen Y, Wang D, Wang Y. The Effects of Allopurinol on the Carotid Intima-media Thickness in Patients with Type 2 Diabetes and Asymptomatic Hyperuricemia: A Three-year Randomized Parallel-controlled Study. *Intern Med* 2015;54:2129-37.
9. Ivanov DD, Ivanova MD. Febuxostat improves GFR and BP in non-diabetic adults with CKD 2-3: 4 years follow-up. *Nephrology Dialysis Transplantation* 2015;30:iii486-iii7.

## Fraudulent studies

1. Salim AS. Oxygen-derived free radicals and the prevention of duodenal ulcer relapse: a new approach. *Am J Med Sci* 1990;300:1-6; discussion 7-8.
2. Salim AS. The relationship between *Helicobacter pylori* and oxygen-derived free radicals in the mechanism of duodenal ulceration. *Intern Med* 1993;32:359-64.
3. Salim AS. Role of free radical scavengers in the management of refractory duodenal ulceration. A new approach. *J Surg Res* 1994;56:45-52.
4. Salim AS. Scavengers of oxygen-derived free radicals prolong survival in advanced colonic cancer. A new approach. *Tumour Biol* 1993;14:9-17.
5. Salim AS. Allopurinol and dimethyl sulfoxide improve treatment outcomes in smokers with peptic ulcer disease. *J Lab Clin Med* 1992;119:702-9.
6. Salim AS. Oxygen-derived free-radical scavengers prolong survival in gastric cancer. *Chemotherapy* 1992;38:135-44.
7. Salim AS. Oxygen-derived free-radical scavengers prolong survival in colonic cancer. *Chemotherapy*. 1992;38:127-34.
8. Salim AS. The role of oxygen-derived free radicals in the management of venous (varicose) ulceration: a new approach. *World J Surg* 1991;15:264-9.
